# Supplementary material
Source: PubMed Central journal article supplement (PMC9175363)
Supplement: 12889_2022_13485_MOESM1_ESM.pdf [file 12889_2022_13485_MOESM1_ESM.pdf]

# **Attitude to the Covid-19 pandemic and the Covid-19 vaccine**

## **Consent**

### **INSTRUCTIONS:**

We are asking you to participate in a research study titled “attitude towards COVID-19 vaccine”. We will describe this study to you and answer any of your questions.

### **What the study is about**

The purpose of this research is to better understand people’s attitude and knowledge about the COVID-19 pandemic and the COVID-19 vaccine.

### **What we will ask you to do**

We will ask you to answer close ended questions. The study should take approximately 3-5 minutes to complete.

### **Risks and discomforts**

We do not anticipate any risks from participating in this research.

### **Benefits**

Information from this study may help us learn more about people’s attitude towards the COVID-19 pandemic and the COVID-19 vaccine.

### **Privacy/Confidentiality/Data Security**

This is an anonymous survey, there is no identifying information we collect from you.

### **Sharing De-identified Data Collected in this Research**

De-identified data from this study may be shared with the research community at large to advance science and health. We will remove or code any personal information that could identify you before files are shared with other researchers to ensure that, by current scientific standards and known methods, no one will be able to identify you from the information we share.

### **Taking part is voluntary**

Your involvement is voluntary, you may refuse to participate before the study begins, and you may discontinue at any time. This survey was designed as a package so that it would be most helpful if you would answer every question unless any of them make you uncomfortable or cause any stress. Note that you have the right not to answer any questions that are stressful or cause discomfort.

### **If you have questions**

The main researcher conducting this study is Hanna Defar Hassen, a medical intern at Jimma University College of Health Sciences. If you have questions later, you may contact Hanna

Defar Hassen at hannadefh@gmail.com or at 0912780966. If you have any questions or concerns regarding your rights as a participant in this study, you may contact Jimma University Ethics Review Committee at 0911409074 or [https://healthresearchweb.org/en/ethiopia/ethics\\_1066](https://healthresearchweb.org/en/ethiopia/ethics_1066).

**Statement of Consent**

- Yes, Continue to Survey
- No, I don't want to take part in this Survey

**Age (Please mark one answer)**

- 18-29
- 30-39
- 40-49
- 50-59
- 60 and above

**Gender (Please mark one answer)**

- Male
- Female

**Marital status (Please mark one answer)**

- Single
- Married
- Divorced
- Widowed

**Educational level (Please mark one answer)**

- No formal education
- Elementary school
- High school
- Diploma
- Degree
- Masters
- Doctorate degree

**Religion (Please mark one answer)**

- Orthodox Christian
- Catholic Christian
- Protestant Christian
- Muslim
- Others

**With how many family members are you living with (Please mark one answer)?**

- 0 (living alone)
- 1
- 2
- 3
- 4
- More than 4

**Monthly income (Please mark one answer)**

- Less than 1000 ETB
- 1000-5500 ETB
- 5500-6900 ETB
- Above 6900 ETB

**Do you have any chronic disease (a disease is chronic when it requires life-long treatment, for example E.g., Diabetics, hypertension, asthma, etc)?**

- Yes
- No

**How would you rate your health overall? Would you say that your health is excellent, good, fair, or poor?**

- Poor
- Fair
- Good
- Excellent

**Do you have any smoking habits (Please mark one answer)?**

- Yes
- No

**Please respond to the following questions?**

|                                                                      | Yes                   | No                    |
|----------------------------------------------------------------------|-----------------------|-----------------------|
| Have you been diagnosed with Covid-19 before?                        | <input type="radio"/> | <input type="radio"/> |
| Have you ever tested for Covid-19 previously ?                       | <input type="radio"/> | <input type="radio"/> |
| Is any of your family member or friend ever diagnosed with COVID-19? | <input type="radio"/> | <input type="radio"/> |
| Has any of your family member or friend died due to COVID-19?        | <input type="radio"/> | <input type="radio"/> |
| Have you already vaccinated for Covid-19?                            | <input type="radio"/> | <input type="radio"/> |

**What is your source of information regarding COVID-19 (Please mark one or more answers)?**

- Social media (WhatsApp, Telegram, Twitter, Instagram, Facebook, Website etc)
- Mass media (TV, Radio, Newspaper)
- Healthcare worker
- Friends, family, neighbor etc

**How willing are you to get a COVID-19 vaccine if it is freely offered to you?**

- Definitely not willing
- Probably not willing
- Not sure
- Probably willing
- Definitely willing

---

**The following 12 items measure your opinion, knowledge or attitude about Covid-19 vaccine. For each item, please choose the option based on how much you agree on each**

**statement (1=strongly disagree if you think you do not agree with the statement;  
5=Strongly agree if you think you do agree with the statement).**

|                                                               | Strongly disagree     | Somewhat disagree     | Neither agree nor disagree | Somewhat agree        | Strongly agree        |
|---------------------------------------------------------------|-----------------------|-----------------------|----------------------------|-----------------------|-----------------------|
| I do not have enough information regarding COVID-19 vaccine.  | <input type="radio"/> | <input type="radio"/> | <input type="radio"/>      | <input type="radio"/> | <input type="radio"/> |
| I have concern with COVID-19 vaccine side effects.            | <input type="radio"/> | <input type="radio"/> | <input type="radio"/>      | <input type="radio"/> | <input type="radio"/> |
| I believe that the COVID-19 vaccine is not safe.              | <input type="radio"/> | <input type="radio"/> | <input type="radio"/>      | <input type="radio"/> | <input type="radio"/> |
| I think that the COVID-19 vaccine is not effective.           | <input type="radio"/> | <input type="radio"/> | <input type="radio"/>      | <input type="radio"/> | <input type="radio"/> |
| I think that COVID-19 is not any more dangerous.              | <input type="radio"/> | <input type="radio"/> | <input type="radio"/>      | <input type="radio"/> | <input type="radio"/> |
| I have fear of COVID-19 infection.                            | <input type="radio"/> | <input type="radio"/> | <input type="radio"/>      | <input type="radio"/> | <input type="radio"/> |
| I am against vaccination in general.                          | <input type="radio"/> | <input type="radio"/> | <input type="radio"/>      | <input type="radio"/> | <input type="radio"/> |
| I have concerns on COVID-19 vaccine due to religious reasons. | <input type="radio"/> | <input type="radio"/> | <input type="radio"/>      | <input type="radio"/> | <input type="radio"/> |
| I have concerns on COVID-19 vaccine due to cultural reasons.  | <input type="radio"/> | <input type="radio"/> | <input type="radio"/>      | <input type="radio"/> | <input type="radio"/> |

I believe I can prevent or treat COVID-19 with traditional remedies than the Covid-19 vaccine.

In general, I am concerned about serious complications of the COVID-19 vaccine.

The COVID-19 vaccines, in general, will be useful in controlling the COVID-19 pandemic.
