# Supplementary material
Source: PubMed Central journal article supplement (PMC9175363)
Supplement: 12889_2022_13485_MOESM2_ESM.pdf [file 12889_2022_13485_MOESM2_ESM.pdf]

| Age | Gen | MaritalSta | Education | Rel | relD   | rel3   | FamilyMer | Income | ChrDis | PercHeal | SmokingBe | CovidDiagn | CovidTest |
|-----|-----|------------|-----------|-----|--------|--------|-----------|--------|--------|----------|-----------|------------|-----------|
| 2   | 1   | 3          | 3         | 4   | #NULL! | 3,00   | 6         | 1      | 0      | 3        | 1         | 1          | 1         |
| 1   | 1   | 1          | 4         | 5   | #NULL! | #NULL! | 2         | 4      | 0      | 4        | 0         | 0          | 1         |
| 1   | 1   | 2          | 4         | 1   | 1,00   | 1,00   | 5         | 2      | 0      | 4        | 0         | 0          | 1         |
| 1   | 2   | 2          | 4         | 3   | 0,00   | 2,00   | 3         | 2      | 0      | 4        | 0         | 0          | 0         |
| 1   | 1   | 1          | 4         | 1   | 1,00   | 1,00   | 1         | 2      | 0      | 4        | 0         | 0          | 0         |
| 1   | 1   | 1          | 4         | 3   | 0,00   | 2,00   | 5         | 1      | 0      | 2        | 0         | 0          | 0         |
| 1   | 1   | 1          | 4         | 3   | 0,00   | 2,00   | 5         | 1      | 0      | 2        | 0         | 0          | 0         |
| 1   | 2   | 2          | 4         | 3   | 0,00   | 2,00   | 2         | 3      | 0      | 4        | 0         | 0          | 1         |
| 1   | 1   | 1          | 4         | 1   | 1,00   | 1,00   | 6         | 1      | 0      | #NULL!   | 0         | 0          | 0         |
| 1   | 2   | 1          | 4         | 3   | 0,00   | 2,00   | 5         | 2      | 0      | 4        | 0         | 0          | 1         |
| 1   | 1   | 1          | 4         | 4   | #NULL! | 3,00   | 6         | 1      | 0      | 4        | 0         | 0          | 0         |
| 1   | 1   | 1          | 3         | 1   | 1,00   | 1,00   | 4         | 2      | 0      | 4        | 0         | 0          | 0         |
| 2   | 2   | 2          | 3         | 1   | 1,00   | 1,00   | 6         | 2      | 0      | 4        | 0         | 0          | 1         |
| 1   | 1   | 1          | 4         | 3   | 0,00   | 2,00   | 6         | 4      | 0      | 4        | 0         | 0          | 1         |
| 1   | 1   | 1          | 4         | 3   | 0,00   | 2,00   | 1         | 3      | 0      | 4        | 0         | 0          | 0         |
| 2   | 1   | 2          | 5         | 3   | 0,00   | 2,00   | 3         | 3      | 0      | 3        | 0         | 0          | 1         |
| 1   | 2   | 1          | 5         | 4   | #NULL! | 3,00   | 1         | 2      | 0      | 4        | 0         | 0          | 1         |
| 1   | 2   | 2          | 4         | 1   | 1,00   | 1,00   | 5         | 3      | 1      | 4        | 1         | 0          | 1         |
| 1   | 2   | 2          | 4         | 4   | #NULL! | 3,00   | 5         | 2      | 0      | 4        | 0         | 0          | 0         |
| 1   | 1   | 1          | 4         | 1   | 1,00   | 1,00   | 1         | 4      | 0      | 4        | 0         | 0          | 1         |
| 1   | 2   | 1          | 4         | 4   | #NULL! | 3,00   | 6         | 2      | 0      | 3        | 0         | 0          | 0         |
| 1   | 2   | 1          | 3         | 4   | #NULL! | 3,00   | 5         | 1      | 1      | 3        | 0         | 0          | 1         |
| 1   | 1   | 1          | 4         | 4   | #NULL! | 3,00   | 3         | 2      | 0      | 2        | 0         | 0          | 0         |
| 1   | 2   | 1          | 4         | 4   | #NULL! | 3,00   | 6         | 2      | 1      | 3        | 0         | 0          | 1         |
| 1   | 2   | 1          | 4         | 4   | #NULL! | 3,00   | 6         | 2      | 1      | 3        | 0         | 0          | 1         |
| 1   | 1   | 1          | 4         | 4   | #NULL! | 3,00   | 3         | 1      | 0      | 4        | 0         | 0          | 0         |
| 2   | 1   | 1          | 4         | 1   | 1,00   | 1,00   | 1         | 3      | 0      | 4        | 0         | 0          | 1         |
| 1   | 1   | 1          | 4         | 1   | 1,00   | 1,00   | 6         | 4      | 1      | 3        | 0         | 0          | 0         |
| 1   | 1   | 1          | 4         | 3   | 0,00   | 2,00   | 3         | 3      | 0      | 3        | 0         | 0          | 0         |
| 1   | 1   | 1          | 4         | 5   | #NULL! | #NULL! | 1         | 2      | 0      | 4        | 0         | 1          | 1         |
| 1   | 2   | 2          | 4         | 4   | #NULL! | 3,00   | 5         | 2      | 0      | 4        | 0         | 0          | 0         |
| 1   | 2   | 1          | 4         | 1   | 1,00   | 1,00   | 6         | 1      | 0      | 4        | 0         | 0          | 0         |

|   |   |   |   |   |        |        |   |   |   |   |   |   |   |
|---|---|---|---|---|--------|--------|---|---|---|---|---|---|---|
| 1 | 1 | 1 | 4 | 1 | 1,00   | 1,00   | 6 | 2 | 0 | 3 | 0 | 0 | 0 |
| 1 | 1 | 1 | 4 | 4 | #NULL! | 3,00   | 3 | 1 | 0 | 3 | 0 | 0 | 1 |
| 1 | 2 | 1 | 4 | 4 | #NULL! | 3,00   | 6 | 1 | 0 | 4 | 0 | 0 | 0 |
| 1 | 1 | 1 | 4 | 3 | 0,00   | 2,00   | 1 | 2 | 0 | 4 | 0 | 0 | 0 |
| 1 | 1 | 1 | 4 | 4 | #NULL! | 3,00   | 3 | 1 | 0 | 4 | 0 | 0 | 1 |
| 2 | 2 | 2 | 3 | 3 | 0,00   | 2,00   | 6 | 2 | 0 | 4 | 0 | 1 | 1 |
| 4 | 2 | 4 | 3 | 5 | #NULL! | #NULL! | 1 | 2 | 1 | 3 | 0 | 0 | 0 |
| 2 | 1 | 1 | 5 | 5 | #NULL! | #NULL! | 1 | 4 | 0 | 3 | 0 | 0 | 0 |
| 1 | 2 | 1 | 4 | 3 | 0,00   | 2,00   | 5 | 1 | 0 | 3 | 0 | 0 | 0 |
| 1 | 1 | 3 | 3 | 1 | 1,00   | 1,00   | 6 | 1 | 1 | 3 | 1 | 0 | 0 |
| 2 | 1 | 2 | 1 | 1 | 1,00   | 1,00   | 3 | 1 | 0 | 4 | 0 | 0 | 0 |
| 1 | 1 | 1 | 3 | 1 | 1,00   | 1,00   | 4 | 1 | 1 | 2 | 0 | 0 | 0 |
| 1 | 1 | 1 | 4 | 1 | 1,00   | 1,00   | 5 | 1 | 1 | 4 | 1 | 0 | 1 |
| 1 | 1 | 1 | 4 | 1 | 1,00   | 1,00   | 5 | 1 | 0 | 4 | 0 | 0 | 1 |
| 1 | 1 | 1 | 4 | 5 | #NULL! | #NULL! | 6 | 1 | 0 | 3 | 0 | 0 | 0 |
| 1 | 2 | 2 | 2 | 1 | 1,00   | 1,00   | 4 | 2 | 0 | 3 | 0 | 0 | 0 |
| 1 | 1 | 1 | 4 | 3 | 0,00   | 2,00   | 6 | 2 | 0 | 4 | 0 | 0 | 0 |
| 1 | 1 | 1 | 4 | 3 | 0,00   | 2,00   | 1 | 1 | 0 | 4 | 0 | 0 | 0 |
| 1 | 2 | 1 | 4 | 5 | #NULL! | #NULL! | 6 | 2 | 0 | 4 | 0 | 0 | 0 |
| 1 | 1 | 1 | 4 | 3 | 0,00   | 2,00   | 6 | 2 | 0 | 4 | 0 | 0 | 0 |
| 1 | 1 | 1 | 4 | 3 | 0,00   | 2,00   | 5 | 3 | 0 | 4 | 0 | 0 | 0 |
| 1 | 1 | 1 | 4 | 3 | 0,00   | 2,00   | 6 | 2 | 0 | 4 | 0 | 0 | 0 |
| 1 | 1 | 1 | 4 | 3 | 0,00   | 2,00   | 4 | 2 | 0 | 4 | 0 | 0 | 0 |
| 1 | 1 | 1 | 4 | 3 | 0,00   | 2,00   | 5 | 2 | 0 | 4 | 0 | 0 | 0 |
| 1 | 2 | 1 | 4 | 4 | #NULL! | 3,00   | 5 | 1 | 0 | 3 | 0 | 0 | 0 |
| 1 | 1 | 2 | 1 | 1 | 1,00   | 1,00   | 5 | 2 | 0 | 4 | 0 | 0 | 0 |
| 2 | 1 | 2 | 3 | 4 | #NULL! | 3,00   | 3 | 2 | 0 | 4 | 0 | 1 | 1 |
| 1 | 1 | 1 | 4 | 3 | 0,00   | 2,00   | 6 | 1 | 0 | 4 | 0 | 0 | 0 |
| 1 | 1 | 2 | 4 | 3 | 0,00   | 2,00   | 3 | 2 | 0 | 4 | 0 | 0 | 0 |
| 1 | 2 | 1 | 0 | 4 | #NULL! | 3,00   | 2 | 1 | 1 | 2 | 0 | 1 | 0 |
| 3 | 1 | 2 | 3 | 3 | 0,00   | 2,00   | 3 | 2 | 1 | 2 | 0 | 0 | 1 |
| 1 | 2 | 1 | 4 | 1 | 1,00   | 1,00   | 6 | 3 | 0 | 4 | 0 | 0 | 0 |
| 1 | 1 | 1 | 4 | 1 | 1,00   | 1,00   | 1 | 4 | 0 | 4 | 0 | 0 | 0 |

|   |   |   |   |   |        |        |   |   |   |   |   |   |   |
|---|---|---|---|---|--------|--------|---|---|---|---|---|---|---|
| 1 | 2 | 1 | 3 | 1 | 1,00   | 1,00   | 6 | 1 | 0 | 4 | 0 | 0 | 1 |
| 1 | 1 | 2 | 5 | 4 | #NULL! | 3,00   | 2 | 4 | 0 | 3 | 0 | 0 | 0 |
| 2 | 1 | 1 | 6 | 2 | #NULL! | #NULL! | 5 | 4 | 0 | 3 | 0 | 0 | 0 |
| 1 | 2 | 1 | 4 | 1 | 1,00   | 1,00   | 6 | 1 | 0 | 4 | 0 | 0 | 0 |
| 1 | 2 | 1 | 4 | 1 | 1,00   | 1,00   | 6 | 1 | 0 | 4 | 0 | 0 | 0 |
| 1 | 2 | 1 | 2 | 1 | 1,00   | 1,00   | 2 | 1 | 0 | 3 | 0 | 0 | 0 |
| 1 | 1 | 1 | 3 | 1 | 1,00   | 1,00   | 5 | 3 | 0 | 2 | 0 | 0 | 0 |
| 1 | 2 | 1 | 4 | 3 | 0,00   | 2,00   | 1 | 2 | 1 | 3 | 0 | 1 | 1 |
| 2 | 2 | 2 | 4 | 1 | 1,00   | 1,00   | 6 | 4 | 0 | 4 | 0 | 0 | 0 |
| 1 | 1 | 1 | 4 | 3 | 0,00   | 2,00   | 4 | 1 | 0 | 3 | 0 | 0 | 1 |
| 4 | 1 | 2 | 4 | 4 | #NULL! | 3,00   | 6 | 3 | 0 | 3 | 0 | 0 | 0 |
| 2 | 1 | 1 | 3 | 1 | 1,00   | 1,00   | 1 | 2 | 0 | 4 | 0 | 0 | 0 |
| 1 | 1 | 1 | 4 | 3 | 0,00   | 2,00   | 6 | 1 | 0 | 3 | 0 | 0 | 1 |
| 1 | 1 | 1 | 4 | 1 | 1,00   | 1,00   | 3 | 1 | 0 | 2 | 0 | 0 | 0 |
| 1 | 1 | 1 | 4 | 4 | #NULL! | 3,00   | 4 | 1 | 0 | 4 | 0 | 0 | 0 |
| 5 | 1 | 3 | 0 | 3 | 0,00   | 2,00   | 5 | 2 | 1 | 2 | 0 | 0 | 1 |
| 1 | 2 | 1 | 3 | 1 | 1,00   | 1,00   | 6 | 1 | 0 | 4 | 0 | 0 | 0 |
| 1 | 2 | 1 | 3 | 3 | 0,00   | 2,00   | 6 | 1 | 0 | 4 | 0 | 0 | 0 |
| 1 | 2 | 1 | 3 | 3 | 0,00   | 2,00   | 6 | 1 | 0 | 4 | 0 | 0 | 0 |
| 2 | 2 | 3 | 3 | 1 | 1,00   | 1,00   | 6 | 2 | 1 | 3 | 0 | 0 | 1 |
| 1 | 2 | 2 | 2 | 3 | 0,00   | 2,00   | 5 | 1 | 0 | 4 | 0 | 0 | 0 |
| 1 | 1 | 2 | 4 | 3 | 0,00   | 2,00   | 4 | 2 | 0 | 2 | 0 | 0 | 0 |
| 2 | 1 | 2 | 4 | 3 | 0,00   | 2,00   | 5 | 2 | 0 | 3 | 0 | 0 | 0 |
| 2 | 1 | 1 | 1 | 2 | #NULL! | #NULL! | 2 | 2 | 1 | 2 | 0 | 0 | 0 |
| 2 | 1 | 1 | 3 | 1 | 1,00   | 1,00   | 5 | 2 | 0 | 2 | 0 | 0 | 0 |
| 1 | 1 | 1 | 3 | 1 | 1,00   | 1,00   | 1 | 2 | 0 | 3 | 0 | 0 | 0 |
| 2 | 1 | 2 | 3 | 4 | #NULL! | 3,00   | 3 | 2 | 0 | 4 | 0 | 0 | 1 |
| 1 | 1 | 1 | 4 | 1 | 1,00   | 1,00   | 5 | 4 | 0 | 4 | 0 | 0 | 0 |
| 1 | 2 | 2 | 3 | 1 | 1,00   | 1,00   | 4 | 2 | 1 | 2 | 0 | 0 | 0 |
| 2 | 1 | 1 | 4 | 3 | 0,00   | 2,00   | 5 | 2 | 0 | 4 | 0 | 0 | 0 |
| 4 | 2 | 2 | 3 | 3 | 0,00   | 2,00   | 6 | 4 | 1 | 3 | 0 | 0 | 0 |
| 1 | 1 | 1 | 3 | 3 | 0,00   | 2,00   | 6 | 1 | 0 | 4 | 0 | 0 | 0 |
| 3 | 1 | 2 | 4 | 3 | 0,00   | 2,00   | 6 | 2 | 0 | 4 | 0 | 0 | 0 |

|   |   |   |   |   |        |        |   |   |   |   |   |   |   |
|---|---|---|---|---|--------|--------|---|---|---|---|---|---|---|
| 1 | 1 | 2 | 3 | 1 | 1,00   | 1,00   | 4 | 2 | 0 | 4 | 0 | 0 | 0 |
| 1 | 1 | 1 | 3 | 1 | 1,00   | 1,00   | 5 | 3 | 0 | 2 | 0 | 0 | 0 |
| 1 | 1 | 1 | 4 | 3 | 0,00   | 2,00   | 2 | 4 | 0 | 3 | 0 | 0 | 0 |
| 1 | 2 | 1 | 3 | 1 | 1,00   | 1,00   | 1 | 2 | 0 | 2 | 0 | 0 | 0 |
| 1 | 1 | 2 | 4 | 1 | 1,00   | 1,00   | 4 | 2 | 0 | 2 | 0 | 0 | 0 |
| 1 | 1 | 1 | 3 | 1 | 1,00   | 1,00   | 5 | 2 | 0 | 4 | 0 | 0 | 0 |
| 1 | 1 | 2 | 3 | 1 | 1,00   | 1,00   | 2 | 2 | 0 | 2 | 0 | 0 | 0 |
| 1 | 2 | 2 | 3 | 1 | 1,00   | 1,00   | 4 | 1 | 0 | 3 | 0 | 0 | 1 |
| 4 | 2 | 2 | 3 | 1 | 1,00   | 1,00   | 6 | 4 | 0 | 4 | 0 | 0 | 0 |
| 3 | 2 | 2 | 4 | 1 | 1,00   | 1,00   | 6 | 2 | 0 | 4 | 0 | 0 | 0 |
| 1 | 1 | 1 | 4 | 2 | #NULL! | #NULL! | 1 | 2 | 0 | 4 | 0 | 0 | 0 |
| 1 | 1 | 1 | 4 | 3 | 0,00   | 2,00   | 1 | 2 | 1 | 3 | 0 | 0 | 0 |
| 1 | 1 | 2 | 3 | 1 | 1,00   | 1,00   | 3 | 2 | 1 | 2 | 0 | 0 | 0 |
| 2 | 1 | 1 | 4 | 3 | 0,00   | 2,00   | 1 | 3 | 0 | 4 | 0 | 0 | 1 |
| 1 | 2 | 3 | 3 | 4 | #NULL! | 3,00   | 3 | 4 | 0 | 3 | 0 | 0 | 0 |
| 2 | 2 | 2 | 4 | 4 | #NULL! | 3,00   | 5 | 2 | 0 | 2 | 0 | 0 | 0 |
| 1 | 1 | 1 | 4 | 1 | 1,00   | 1,00   | 1 | 2 | 0 | 4 | 0 | 0 | 0 |
| 1 | 1 | 1 | 5 | 3 | 0,00   | 2,00   | 1 | 3 | 0 | 4 | 0 | 0 | 0 |
| 2 | 1 | 2 | 4 | 3 | 0,00   | 2,00   | 5 | 4 | 0 | 3 | 0 | 0 | 0 |
| 2 | 1 | 2 | 4 | 4 | #NULL! | 3,00   | 6 | 2 | 0 | 3 | 0 | 0 | 0 |
| 2 | 1 | 1 | 2 | 1 | 1,00   | 1,00   | 5 | 1 | 0 | 3 | 0 | 0 | 0 |
| 2 | 1 | 1 | 3 | 1 | 1,00   | 1,00   | 1 | 2 | 0 | 4 | 0 | 0 | 0 |
| 2 | 1 | 1 | 2 | 1 | 1,00   | 1,00   | 3 | 2 | 0 | 3 | 0 | 0 | 0 |
| 1 | 2 | 2 | 4 | 4 | #NULL! | 3,00   | 3 | 3 | 0 | 4 | 0 | 0 | 0 |
| 2 | 2 | 2 | 4 | 4 | #NULL! | 3,00   | 5 | 2 | 0 | 4 | 0 | 0 | 0 |
| 3 | 1 | 2 | 4 | 4 | #NULL! | 3,00   | 6 | 4 | 0 | 2 | 0 | 0 | 0 |
| 1 | 1 | 1 | 4 | 1 | 1,00   | 1,00   | 1 | 1 | 0 | 2 | 0 | 0 | 0 |
| 3 | 2 | 2 | 3 | 3 | 0,00   | 2,00   | 6 | 1 | 0 | 4 | 0 | 0 | 1 |
| 1 | 2 | 1 | 6 | 3 | 0,00   | 2,00   | 1 | 3 | 1 | 2 | 0 | 0 | 1 |
| 1 | 2 | 1 | 4 | 1 | 1,00   | 1,00   | 6 | 1 | 0 | 4 | 0 | 0 | 0 |
| 1 | 2 | 2 | 3 | 3 | 0,00   | 2,00   | 6 | 1 | 0 | 4 | 0 | 0 | 1 |
| 1 | 2 | 2 | 4 | 3 | 0,00   | 2,00   | 1 | 2 | 0 | 4 | 0 | 0 | 1 |
| 1 | 2 | 2 | 1 | 3 | 0,00   | 2,00   | 4 | 1 | 0 | 4 | 0 | 0 | 0 |

|   |   |   |   |   |        |        |   |   |   |   |   |   |   |
|---|---|---|---|---|--------|--------|---|---|---|---|---|---|---|
| 1 | 2 | 1 | 4 | 1 | 1,00   | 1,00   | 6 | 3 | 0 | 4 | 0 | 0 | 1 |
| 1 | 1 | 1 | 4 | 1 | 1,00   | 1,00   | 6 | 2 | 0 | 4 | 0 | 0 | 1 |
| 1 | 1 | 1 | 4 | 4 | #NULL! | 3,00   | 6 | 2 | 0 | 3 | 0 | 0 | 0 |
| 1 | 1 | 1 | 4 | 4 | #NULL! | 3,00   | 6 | 1 | 0 | 2 | 0 | 0 | 0 |
| 1 | 1 | 1 | 4 | 4 | #NULL! | 3,00   | 6 | 1 | 0 | 3 | 0 | 0 | 1 |
| 5 | 1 | 4 | 6 | 4 | #NULL! | 3,00   | 6 | 1 | 0 | 2 | 0 | 0 | 1 |
| 3 | 1 | 2 | 4 | 3 | 0,00   | 2,00   | 5 | 2 | 0 | 4 | 0 | 0 | 0 |
| 2 | 1 | 1 | 4 | 1 | 1,00   | 1,00   | 4 | 2 | 0 | 4 | 0 | 0 | 0 |
| 2 | 1 | 1 | 3 | 1 | 1,00   | 1,00   | 3 | 3 | 0 | 2 | 0 | 0 | 0 |
| 5 | 1 | 2 | 0 | 5 | #NULL! | #NULL! | 6 | 1 | 1 | 3 | 0 | 0 | 0 |
| 1 | 1 | 1 | 4 | 3 | 0,00   | 2,00   | 4 | 1 | 0 | 3 | 0 | 0 | 0 |
| 1 | 1 | 1 | 4 | 1 | 1,00   | 1,00   | 1 | 1 | 0 | 3 | 0 | 0 | 0 |
| 1 | 1 | 1 | 4 | 1 | 1,00   | 1,00   | 5 | 2 | 0 | 3 | 0 | 0 | 0 |
| 1 | 2 | 1 | 4 | 3 | 0,00   | 2,00   | 6 | 1 | 1 | 3 | 0 | 0 | 0 |
| 1 | 1 | 1 | 4 | 4 | #NULL! | 3,00   | 6 | 2 | 0 | 3 | 0 | 0 | 0 |
| 1 | 1 | 1 | 4 | 4 | #NULL! | 3,00   | 6 | 1 | 0 | 4 | 0 | 0 | 1 |
| 1 | 2 | 1 | 4 | 4 | #NULL! | 3,00   | 6 | 1 | 0 | 4 | 0 | 0 | 0 |
| 1 | 1 | 1 | 4 | 1 | 1,00   | 1,00   | 6 | 2 | 0 | 3 | 0 | 0 | 0 |
| 1 | 2 | 1 | 4 | 1 | 1,00   | 1,00   | 6 | 2 | 0 | 3 | 0 | 0 | 0 |
| 1 | 2 | 1 | 4 | 4 | #NULL! | 3,00   | 6 | 1 | 0 | 4 | 0 | 0 | 0 |
| 1 | 1 | 1 | 4 | 3 | 0,00   | 2,00   | 6 | 1 | 0 | 4 | 0 | 0 | 0 |
| 1 | 1 | 2 | 4 | 1 | 1,00   | 1,00   | 4 | 3 | 0 | 4 | 1 | 0 | 0 |
| 1 | 2 | 2 | 4 | 3 | 0,00   | 2,00   | 6 | 1 | 0 | 4 | 0 | 0 | 0 |
| 1 | 1 | 1 | 3 | 1 | 1,00   | 1,00   | 2 | 2 | 0 | 2 | 0 | 0 | 0 |
| 2 | 2 | 2 | 3 | 3 | 0,00   | 2,00   | 6 | 3 | 0 | 4 | 0 | 0 | 0 |
| 1 | 1 | 1 | 6 | 4 | #NULL! | 3,00   | 1 | 3 | 0 | 3 | 1 | 0 | 0 |
| 2 | 1 | 2 | 4 | 4 | #NULL! | 3,00   | 4 | 3 | 0 | 4 | 0 | 0 | 0 |
| 1 | 1 | 1 | 2 | 4 | #NULL! | 3,00   | 6 | 1 | 0 | 3 | 0 | 0 | 0 |
| 1 | 1 | 1 | 3 | 1 | 1,00   | 1,00   | 6 | 2 | 0 | 4 | 0 | 0 | 0 |
| 1 | 2 | 1 | 4 | 1 | 1,00   | 1,00   | 5 | 2 | 0 | 3 | 0 | 0 | 0 |
| 1 | 1 | 2 | 5 | 3 | 0,00   | 2,00   | 4 | 4 | 0 | 3 | 0 | 0 | 0 |
| 1 | 1 | 1 | 4 | 3 | 0,00   | 2,00   | 6 | 2 | 0 | 4 | 0 | 0 | 0 |
| 1 | 1 | 1 | 4 | 1 | 1,00   | 1,00   | 6 | 1 | 0 | 4 | 0 | 0 | 0 |

|   |   |   |   |   |        |        |   |   |   |   |   |   |   |
|---|---|---|---|---|--------|--------|---|---|---|---|---|---|---|
| 1 | 1 | 1 | 4 | 1 | 1,00   | 1,00   | 4 | 1 | 0 | 4 | 0 | 0 | 1 |
| 1 | 1 | 1 | 4 | 1 | 1,00   | 1,00   | 6 | 2 | 1 | 2 | 0 | 0 | 0 |
| 1 | 1 | 1 | 4 | 3 | 0,00   | 2,00   | 5 | 2 | 0 | 4 | 0 | 0 | 0 |
| 1 | 1 | 1 | 4 | 1 | 1,00   | 1,00   | 4 | 1 | 0 | 4 | 0 | 0 | 0 |
| 1 | 1 | 1 | 0 | 5 | #NULL! | #NULL! | 1 | 1 | 1 | 1 | 1 | 0 | 1 |
| 1 | 1 | 1 | 4 | 1 | 1,00   | 1,00   | 6 | 1 | 0 | 4 | 0 | 0 | 0 |
| 1 | 2 | 1 | 2 | 1 | 1,00   | 1,00   | 5 | 3 | 0 | 2 | 0 | 0 | 0 |
| 2 | 2 | 2 | 4 | 1 | 1,00   | 1,00   | 3 | 4 | 0 | 3 | 0 | 0 | 0 |
| 2 | 2 | 2 | 3 | 3 | 0,00   | 2,00   | 3 | 2 | 1 | 3 | 0 | 0 | 0 |
| 1 | 2 | 1 | 4 | 4 | #NULL! | 3,00   | 6 | 1 | 0 | 4 | 0 | 0 | 0 |
| 2 | 2 | 2 | 4 | 1 | 1,00   | 1,00   | 6 | 3 | 0 | 3 | 0 | 0 | 0 |
| 1 | 2 | 1 | 4 | 2 | #NULL! | #NULL! | 6 | 2 | 0 | 2 | 0 | 0 | 0 |
| 1 | 2 | 1 | 4 | 2 | #NULL! | #NULL! | 6 | 2 | 0 | 3 | 0 | 0 | 1 |
| 2 | 2 | 2 | 4 | 3 | 0,00   | 2,00   | 5 | 3 | 1 | 2 | 0 | 0 | 1 |
| 2 | 2 | 2 | 3 | 4 | #NULL! | 3,00   | 5 | 3 | 0 | 3 | 0 | 0 | 0 |
| 1 | 2 | 1 | 3 | 1 | 1,00   | 1,00   | 6 | 1 | 0 | 2 | 0 | 1 | 1 |
| 1 | 2 | 1 | 6 | 1 | 1,00   | 1,00   | 6 | 3 | 0 | 3 | 0 | 0 | 0 |
| 1 | 2 | 1 | 4 | 3 | 0,00   | 2,00   | 6 | 2 | 0 | 4 | 0 | 0 | 0 |
| 1 | 2 | 1 | 4 | 3 | 0,00   | 2,00   | 6 | 4 | 0 | 4 | 0 | 0 | 0 |
| 1 | 2 | 1 | 1 | 1 | 1,00   | 1,00   | 6 | 2 | 0 | 3 | 0 | 0 | 0 |
| 1 | 2 | 1 | 3 | 3 | 0,00   | 2,00   | 6 | 2 | 0 | 3 | 0 | 0 | 1 |
| 1 | 2 | 1 | 3 | 3 | 0,00   | 2,00   | 5 | 2 | 0 | 3 | 0 | 0 | 0 |
| 1 | 2 | 1 | 4 | 4 | #NULL! | 3,00   | 6 | 1 | 0 | 2 | 0 | 0 | 1 |
| 3 | 2 | 2 | 3 | 3 | 0,00   | 2,00   | 6 | 2 | 1 | 3 | 0 | 0 | 0 |
| 2 | 2 | 2 | 3 | 4 | #NULL! | 3,00   | 4 | 4 | 0 | 3 | 0 | 0 | 1 |
| 1 | 2 | 1 | 4 | 1 | 1,00   | 1,00   | 6 | 2 | 0 | 4 | 0 | 0 | 1 |
| 1 | 2 | 1 | 3 | 4 | #NULL! | 3,00   | 2 | 2 | 1 | 3 | 0 | 0 | 0 |
| 1 | 2 | 1 | 4 | 3 | 0,00   | 2,00   | 5 | 2 | 0 | 3 | 0 | 0 | 0 |
| 1 | 2 | 2 | 4 | 1 | 1,00   | 1,00   | 4 | 2 | 0 | 2 | 0 | 0 | 0 |
| 2 | 2 | 1 | 4 | 3 | 0,00   | 2,00   | 6 | 4 | 0 | 4 | 0 | 0 | 1 |
| 4 | 2 | 3 | 4 | 3 | 0,00   | 2,00   | 4 | 4 | 0 | 3 | 0 | 0 | 0 |
| 3 | 2 | 3 | 3 | 1 | 1,00   | 1,00   | 4 | 2 | 1 | 2 | 0 | 0 | 1 |
| 1 | 1 | 1 | 3 | 4 | #NULL! | 3,00   | 1 | 2 | 0 | 3 | 1 | 0 | 0 |

|   |   |   |   |   |        |        |   |   |   |   |   |   |   |
|---|---|---|---|---|--------|--------|---|---|---|---|---|---|---|
| 1 | 1 | 1 | 4 | 1 | 1,00   | 1,00   | 3 | 2 | 0 | 4 | 0 | 0 | 0 |
| 1 | 1 | 1 | 4 | 1 | 1,00   | 1,00   | 6 | 1 | 0 | 2 | 1 | 1 | 1 |
| 1 | 1 | 1 | 4 | 1 | 1,00   | 1,00   | 6 | 1 | 0 | 3 | 0 | 0 | 0 |
| 1 | 1 | 1 | 3 | 1 | 1,00   | 1,00   | 1 | 2 | 0 | 4 | 0 | 0 | 0 |
| 1 | 1 | 1 | 4 | 4 | #NULL! | 3,00   | 6 | 2 | 0 | 4 | 0 | 0 | 0 |
| 1 | 1 | 1 | 4 | 3 | 0,00   | 2,00   | 6 | 2 | 0 | 4 | 0 | 0 | 1 |
| 1 | 1 | 1 | 4 | 3 | 0,00   | 2,00   | 5 | 2 | 0 | 4 | 0 | 0 | 0 |
| 1 | 1 | 2 | 4 | 3 | 0,00   | 2,00   | 3 | 3 | 0 | 2 | 0 | 0 | 0 |
| 1 | 1 | 2 | 4 | 3 | 0,00   | 2,00   | 2 | 2 | 0 | 4 | 0 | 0 | 0 |
| 1 | 2 | 1 | 4 | 3 | 0,00   | 2,00   | 6 | 4 | 0 | 3 | 0 | 0 | 1 |
| 1 | 2 | 1 | 4 | 3 | 0,00   | 2,00   | 5 | 1 | 0 | 4 | 0 | 1 | 1 |
| 1 | 2 | 1 | 4 | 4 | #NULL! | 3,00   | 5 | 4 | 0 | 2 | 0 | 0 | 0 |
| 1 | 1 | 1 | 4 | 4 | #NULL! | 3,00   | 6 | 1 | 0 | 3 | 0 | 0 | 1 |
| 1 | 1 | 1 | 3 | 3 | 0,00   | 2,00   | 6 | 2 | 0 | 3 | 0 | 0 | 0 |
| 1 | 1 | 1 | 4 | 3 | 0,00   | 2,00   | 6 | 2 | 0 | 4 | 0 | 0 | 0 |
| 1 | 1 | 2 | 3 | 3 | 0,00   | 2,00   | 4 | 2 | 0 | 4 | 0 | 0 | 1 |
| 1 | 1 | 1 | 4 | 1 | 1,00   | 1,00   | 5 | 2 | 0 | 3 | 0 | 0 | 0 |
| 2 | 1 | 2 | 3 | 4 | #NULL! | 3,00   | 2 | 1 | 0 | 4 | 0 | 0 | 0 |
| 1 | 1 | 1 | 4 | 1 | 1,00   | 1,00   | 6 | 1 | 0 | 4 | 0 | 0 | 0 |
| 1 | 1 | 1 | 4 | 4 | #NULL! | 3,00   | 6 | 1 | 0 | 4 | 0 | 0 | 0 |
| 1 | 1 | 2 | 5 | 3 | 0,00   | 2,00   | 5 | 4 | 0 | 4 | 0 | 0 | 1 |
| 1 | 2 | 1 | 4 | 3 | 0,00   | 2,00   | 5 | 1 | 0 | 3 | 0 | 0 | 1 |
| 1 | 1 | 1 | 4 | 3 | 0,00   | 2,00   | 6 | 3 | 0 | 3 | 0 | 0 | 0 |
| 1 | 1 | 1 | 4 | 1 | 1,00   | 1,00   | 2 | 1 | 0 | 4 | 0 | 0 | 1 |
| 1 | 1 | 1 | 2 | 1 | 1,00   | 1,00   | 5 | 2 | 0 | 3 | 0 | 0 | 1 |
| 2 | 1 | 2 | 3 | 1 | 1,00   | 1,00   | 6 | 2 | 0 | 4 | 0 | 0 | 0 |
| 2 | 2 | 2 | 4 | 3 | 0,00   | 2,00   | 5 | 1 | 0 | 4 | 0 | 0 | 1 |
| 3 | 2 | 1 | 3 | 1 | 1,00   | 1,00   | 5 | 3 | 0 | 3 | 0 | 0 | 0 |
| 1 | 1 | 2 | 4 | 2 | #NULL! | #NULL! | 3 | 2 | 0 | 4 | 0 | 0 | 0 |
| 2 | 1 | 2 | 4 | 3 | 0,00   | 2,00   | 5 | 2 | 0 | 3 | 0 | 0 | 1 |
| 1 | 1 | 1 | 4 | 3 | 0,00   | 2,00   | 6 | 1 | 0 | 4 | 0 | 0 | 0 |
| 1 | 1 | 2 | 3 | 1 | 1,00   | 1,00   | 4 | 3 | 0 | 4 | 0 | 0 | 0 |
| 1 | 1 | 1 | 4 | 1 | 1,00   | 1,00   | 6 | 2 | 0 | 4 | 0 | 0 | 0 |

|   |   |   |   |   |        |        |   |   |   |   |   |   |   |
|---|---|---|---|---|--------|--------|---|---|---|---|---|---|---|
| 1 | 1 | 1 | 4 | 1 | 1,00   | 1,00   | 6 | 1 | 0 | 4 | 0 | 0 | 0 |
| 1 | 1 | 1 | 6 | 1 | 1,00   | 1,00   | 6 | 1 | 0 | 4 | 0 | 0 | 1 |
| 1 | 1 | 1 | 6 | 3 | 0,00   | 2,00   | 6 | 1 | 0 | 3 | 0 | 0 | 0 |
| 1 | 2 | 1 | 4 | 3 | 0,00   | 2,00   | 4 | 3 | 1 | 4 | 0 | 0 | 0 |
| 1 | 1 | 1 | 4 | 1 | 1,00   | 1,00   | 1 | 2 | 0 | 4 | 0 | 0 | 0 |
| 1 | 1 | 1 | 4 | 5 | #NULL! | #NULL! | 6 | 2 | 0 | 4 | 0 | 0 | 0 |
| 1 | 1 | 1 | 2 | 1 | 1,00   | 1,00   | 6 | 1 | 0 | 3 | 0 | 0 | 0 |
| 2 | 1 | 2 | 6 | 5 | #NULL! | #NULL! | 2 | 4 | 0 | 3 | 0 | 0 | 1 |
| 1 | 1 | 1 | 2 | 5 | #NULL! | #NULL! | 6 | 2 | 0 | 4 | 0 | 0 | 0 |
| 1 | 1 | 1 | 6 | 1 | 1,00   | 1,00   | 6 | 3 | 0 | 4 | 0 | 1 | 0 |
| 1 | 1 | 1 | 6 | 1 | 1,00   | 1,00   | 1 | 4 | 0 | 4 | 0 | 0 | 1 |
| 1 | 1 | 1 | 2 | 5 | #NULL! | #NULL! | 6 | 3 | 0 | 4 | 0 | 0 | 0 |
| 1 | 2 | 1 | 4 | 5 | #NULL! | #NULL! | 6 | 2 | 0 | 3 | 0 | 0 | 0 |
| 1 | 1 | 1 | 4 | 5 | #NULL! | #NULL! | 6 | 4 | 0 | 4 | 0 | 0 | 0 |
| 1 | 1 | 1 | 4 | 3 | 0,00   | 2,00   | 6 | 1 | 0 | 4 | 0 | 0 | 1 |
| 4 | 1 | 1 | 4 | 5 | #NULL! | #NULL! | 6 | 3 | 0 | 4 | 0 | 0 | 1 |
| 1 | 1 | 1 | 6 | 5 | #NULL! | #NULL! | 6 | 4 | 0 | 3 | 0 | 0 | 0 |
| 1 | 2 | 2 | 4 | 5 | #NULL! | #NULL! | 3 | 2 | 0 | 4 | 0 | 0 | 0 |
| 1 | 2 | 1 | 4 | 3 | 0,00   | 2,00   | 5 | 2 | 0 | 4 | 0 | 0 | 0 |
| 1 | 1 | 1 | 4 | 1 | 1,00   | 1,00   | 2 | 3 | 0 | 3 | 1 | 0 | 0 |
| 1 | 1 | 1 | 4 | 3 | 0,00   | 2,00   | 6 | 4 | 0 | 4 | 0 | 0 | 0 |
| 2 | 2 | 2 | 4 | 4 | #NULL! | 3,00   | 6 | 4 | 0 | 4 | 0 | 0 | 1 |
| 3 | 1 | 2 | 5 | 3 | 0,00   | 2,00   | 6 | 4 | 0 | 4 | 0 | 1 | 1 |
| 1 | 2 | 1 | 4 | 1 | 1,00   | 1,00   | 5 | 4 | 0 | 2 | 0 | 0 | 0 |
| 1 | 1 | 1 | 4 | 4 | #NULL! | 3,00   | 6 | 3 | 0 | 3 | 0 | 0 | 0 |
| 1 | 1 | 1 | 4 | 4 | #NULL! | 3,00   | 5 | 1 | 0 | 4 | 0 | 0 | 0 |
| 1 | 1 | 2 | 4 | 3 | 0,00   | 2,00   | 2 | 2 | 0 | 4 | 0 | 1 | 1 |
| 1 | 2 | 1 | 4 | 4 | #NULL! | 3,00   | 3 | 2 | 0 | 4 | 0 | 0 | 1 |
| 1 | 1 | 1 | 4 | 5 | #NULL! | #NULL! | 6 | 2 | 0 | 4 | 0 | 0 | 0 |
| 1 | 2 | 1 | 4 | 3 | 0,00   | 2,00   | 2 | 2 | 0 | 4 | 0 | 0 | 0 |
| 1 | 1 | 1 | 5 | 1 | 1,00   | 1,00   | 1 | 4 | 0 | 3 | 0 | 0 | 0 |
| 2 | 1 | 2 | 4 | 3 | 0,00   | 2,00   | 6 | 4 | 0 | 3 | 0 | 0 | 0 |
| 3 | 1 | 2 | 4 | 3 | 0,00   | 2,00   | 5 | 4 | 0 | 3 | 0 | 0 | 0 |

|   |   |   |   |   |        |        |   |   |   |   |   |   |   |
|---|---|---|---|---|--------|--------|---|---|---|---|---|---|---|
| 1 | 1 | 1 | 4 | 3 | 0,00   | 2,00   | 1 | 4 | 0 | 4 | 0 | 0 | 1 |
| 2 | 1 | 2 | 3 | 1 | 1,00   | 1,00   | 4 | 4 | 0 | 4 | 0 | 0 | 1 |
| 1 | 1 | 2 | 2 | 1 | 1,00   | 1,00   | 3 | 2 | 0 | 3 | 0 | 0 | 0 |
| 1 | 1 | 1 | 4 | 4 | #NULL! | 3,00   | 5 | 2 | 0 | 4 | 0 | 0 | 0 |
| 1 | 2 | 2 | 4 | 5 | #NULL! | #NULL! | 5 | 4 | 1 | 2 | 0 | 0 | 0 |
| 2 | 1 | 2 | 4 | 3 | 0,00   | 2,00   | 5 | 4 | 0 | 4 | 0 | 0 | 0 |
| 1 | 1 | 1 | 4 | 3 | 0,00   | 2,00   | 6 | 2 | 0 | 3 | 0 | 0 | 0 |
| 1 | 1 | 2 | 4 | 3 | 0,00   | 2,00   | 5 | 2 | 0 | 4 | 0 | 0 | 1 |
| 1 | 2 | 1 | 4 | 1 | 1,00   | 1,00   | 6 | 1 | 0 | 4 | 0 | 0 | 0 |
| 1 | 1 | 1 | 4 | 1 | 1,00   | 1,00   | 1 | 1 | 0 | 3 | 0 | 0 | 0 |
| 1 | 1 | 1 | 4 | 3 | 0,00   | 2,00   | 6 | 1 | 0 | 4 | 0 | 0 | 1 |
| 1 | 1 | 1 | 4 | 1 | 1,00   | 1,00   | 3 | 2 | 0 | 2 | 0 | 0 | 0 |
| 1 | 1 | 1 | 4 | 3 | 0,00   | 2,00   | 6 | 1 | 0 | 4 | 0 | 0 | 0 |
| 1 | 1 | 1 | 4 | 1 | 1,00   | 1,00   | 1 | 3 | 0 | 4 | 0 | 0 | 1 |
| 1 | 1 | 1 | 4 | 3 | 0,00   | 2,00   | 2 | 2 | 0 | 4 | 0 | 0 | 0 |
| 1 | 1 | 1 | 4 | 1 | 1,00   | 1,00   | 1 | 4 | 0 | 4 | 0 | 1 | 1 |
| 1 | 1 | 2 | 4 | 1 | 1,00   | 1,00   | 5 | 4 | 0 | 4 | 0 | 0 | 1 |
| 1 | 1 | 2 | 4 | 4 | #NULL! | 3,00   | 5 | 2 | 0 | 4 | 0 | 0 | 0 |
| 1 | 2 | 1 | 4 | 3 | 0,00   | 2,00   | 5 | 4 | 0 | 4 | 0 | 0 | 1 |
| 1 | 1 | 1 | 4 | 3 | 0,00   | 2,00   | 6 | 1 | 0 | 4 | 0 | 0 | 0 |
| 1 | 1 | 1 | 4 | 5 | #NULL! | #NULL! | 1 | 3 | 0 | 2 | 1 | 0 | 0 |
| 1 | 2 | 1 | 3 | 4 | #NULL! | 3,00   | 6 | 2 | 0 | 4 | 0 | 0 | 0 |
| 1 | 1 | 1 | 4 | 1 | 1,00   | 1,00   | 4 | 2 | 0 | 3 | 0 | 0 | 0 |
| 2 | 1 | 1 | 5 | 3 | 0,00   | 2,00   | 1 | 3 | 0 | 3 | 0 | 0 | 0 |
| 2 | 1 | 1 | 4 | 3 | 0,00   | 2,00   | 1 | 3 | 0 | 4 | 0 | 0 | 1 |
| 1 | 2 | 1 | 4 | 5 | #NULL! | #NULL! | 1 | 3 | 0 | 3 | 0 | 1 | 1 |
| 3 | 2 | 2 | 3 | 1 | 1,00   | 1,00   | 5 | 4 | 0 | 3 | 0 | 0 | 1 |
| 1 | 2 | 1 | 5 | 4 | #NULL! | 3,00   | 6 | 4 | 0 | 4 | 0 | 0 | 0 |
| 1 | 1 | 1 | 4 | 3 | 0,00   | 2,00   | 6 | 1 | 0 | 4 | 0 | 0 | 0 |
| 1 | 1 | 1 | 4 | 3 | 0,00   | 2,00   | 4 | 1 | 0 | 4 | 0 | 0 | 0 |
| 2 | 2 | 2 | 1 | 2 | #NULL! | #NULL! | 4 | 1 | 0 | 2 | 0 | 0 | 1 |
| 1 | 2 | 1 | 4 | 1 | 1,00   | 1,00   | 1 | 3 | 0 | 4 | 0 | 0 | 0 |
| 1 | 2 | 1 | 4 | 1 | 1,00   | 1,00   | 4 | 3 | 0 | 4 | 0 | 1 | 1 |

|   |   |   |   |   |        |        |   |   |   |   |   |   |   |
|---|---|---|---|---|--------|--------|---|---|---|---|---|---|---|
| 3 | 2 | 2 | 4 | 1 | 1,00   | 1,00   | 6 | 4 | 0 | 3 | 0 | 0 | 1 |
| 1 | 1 | 1 | 4 | 1 | 1,00   | 1,00   | 6 | 2 | 0 | 3 | 0 | 0 | 0 |
| 3 | 1 | 2 | 3 | 4 | #NULL! | 3,00   | 1 | 1 | 0 | 2 | 0 | 1 | 1 |
| 1 | 1 | 1 | 4 | 3 | 0,00   | 2,00   | 3 | 3 | 0 | 4 | 0 | 0 | 0 |
| 1 | 1 | 1 | 4 | 1 | 1,00   | 1,00   | 3 | 3 | 0 | 3 | 0 | 1 | 1 |
| 1 | 1 | 1 | 4 | 1 | 1,00   | 1,00   | 6 | 3 | 0 | 4 | 0 | 0 | 1 |
| 2 | 2 | 1 | 5 | 3 | 0,00   | 2,00   | 6 | 3 | 0 | 3 | 0 | 1 | 1 |
| 1 | 2 | 2 | 3 | 4 | #NULL! | 3,00   | 6 | 2 | 0 | 3 | 0 | 1 | 1 |
| 2 | 1 | 2 | 4 | 1 | 1,00   | 1,00   | 4 | 3 | 0 | 2 | 0 | 0 | 0 |
| 1 | 1 | 1 | 4 | 1 | 1,00   | 1,00   | 4 | 1 | 1 | 2 | 0 | 0 | 0 |
| 1 | 2 | 2 | 4 | 3 | 0,00   | 2,00   | 5 | 4 | 0 | 1 | 0 | 0 | 1 |
| 1 | 1 | 1 | 4 | 1 | 1,00   | 1,00   | 6 | 2 | 0 | 4 | 0 | 0 | 1 |
| 1 | 1 | 1 | 4 | 3 | 0,00   | 2,00   | 6 | 1 | 0 | 2 | 0 | 0 | 0 |
| 1 | 2 | 1 | 4 | 3 | 0,00   | 2,00   | 3 | 2 | 0 | 4 | 0 | 0 | 0 |
| 2 | 1 | 2 | 5 | 1 | 1,00   | 1,00   | 1 | 4 | 0 | 2 | 0 | 0 | 0 |
| 2 | 1 | 2 | 4 | 3 | 0,00   | 2,00   | 3 | 3 | 0 | 4 | 0 | 0 | 1 |
| 1 | 2 | 2 | 4 | 3 | 0,00   | 2,00   | 3 | 2 | 0 | 4 | 0 | 0 | 1 |
| 5 | 1 | 2 | 0 | 1 | 1,00   | 1,00   | 6 | 3 | 0 | 3 | 0 | 0 | 1 |
| 3 | 1 | 2 | 3 | 1 | 1,00   | 1,00   | 3 | 2 | 1 | 2 | 0 | 1 | 1 |
| 3 | 2 | 2 | 3 | 1 | 1,00   | 1,00   | 5 | 2 | 1 | 3 | 0 | 0 | 1 |
| 2 | 2 | 1 | 4 | 4 | #NULL! | 3,00   | 3 | 3 | 0 | 3 | 0 | 0 | 0 |
| 1 | 2 | 2 | 3 | 1 | 1,00   | 1,00   | 6 | 2 | 0 | 3 | 0 | 0 | 1 |
| 1 | 1 | 1 | 4 | 1 | 1,00   | 1,00   | 4 | 1 | 0 | 4 | 0 | 0 | 1 |
| 1 | 1 | 2 | 3 | 1 | 1,00   | 1,00   | 2 | 2 | 0 | 4 | 0 | 0 | 0 |
| 1 | 1 | 1 | 4 | 1 | 1,00   | 1,00   | 5 | 2 | 0 | 3 | 0 | 0 | 0 |
| 5 | 2 | 2 | 2 | 4 | #NULL! | 3,00   | 2 | 3 | 0 | 2 | 0 | 0 | 0 |
| 1 | 1 | 1 | 2 | 3 | 0,00   | 2,00   | 3 | 2 | 0 | 4 | 0 | 0 | 0 |
| 1 | 2 | 1 | 2 | 1 | 1,00   | 1,00   | 2 | 4 | 0 | 3 | 0 | 0 | 1 |
| 1 | 1 | 1 | 4 | 5 | #NULL! | #NULL! | 1 | 3 | 0 | 4 | 0 | 0 | 0 |
| 1 | 2 | 1 | 3 | 3 | 0,00   | 2,00   | 1 | 2 | 0 | 4 | 0 | 1 | 1 |
| 1 | 2 | 1 | 3 | 1 | 1,00   | 1,00   | 1 | 3 | 0 | 2 | 0 | 0 | 1 |
| 1 | 2 | 1 | 4 | 1 | 1,00   | 1,00   | 2 | 3 | 0 | 3 | 0 | 0 | 1 |
| 1 | 1 | 2 | 3 | 1 | 1,00   | 1,00   | 3 | 2 | 0 | 4 | 0 | 0 | 0 |

|   |   |   |   |   |      |      |   |   |   |   |   |   |   |
|---|---|---|---|---|------|------|---|---|---|---|---|---|---|
| 1 | 2 | 1 | 4 | 1 | 1,00 | 1,00 | 1 | 2 | 0 | 4 | 0 | 1 | 1 |
| 1 | 1 | 1 | 4 | 3 | 0,00 | 2,00 | 5 | 3 | 0 | 3 | 0 | 0 | 0 |
| 1 | 2 | 1 | 5 | 3 | 0,00 | 2,00 | 6 | 3 | 0 | 3 | 0 | 0 | 1 |
| 1 | 2 | 1 | 4 | 1 | 1,00 | 1,00 | 1 | 2 | 0 | 4 | 0 | 0 | 1 |
| 1 | 1 | 2 | 4 | 3 | 0,00 | 2,00 | 4 | 2 | 0 | 4 | 0 | 0 | 1 |
| 1 | 2 | 3 | 6 | 1 | 1,00 | 1,00 | 4 | 2 | 0 | 3 | 0 | 0 | 0 |
| 1 | 1 | 1 | 4 | 3 | 0,00 | 2,00 | 6 | 2 | 0 | 4 | 0 | 0 | 0 |
| 1 | 2 | 1 | 2 | 1 | 1,00 | 1,00 | 6 | 2 | 0 | 3 | 0 | 0 | 0 |
| 1 | 1 | 1 | 2 | 3 | 0,00 | 2,00 | 4 | 3 | 0 | 4 | 0 | 0 | 1 |

| CovidFami | CovidFami SM | MM     | HCW    | FFN    | MedExp | VH_DIC | informatio | efficacy_o | DisSev3 | DisSev2 | DiseaseSev | SC0 | Platform |      |
|-----------|--------------|--------|--------|--------|--------|--------|------------|------------|---------|---------|------------|-----|----------|------|
| 1         | 0            | 1      | 1      | #NULL! | #NULL! | 2,00   | 1,00       | 3          | 3       | 3,00    | 2          | 3   | 53,00    | 0,00 |
| 0         | 0            | #NULL! | 1      | 1      | #NULL! | 2,00   | 1,00       | 1          | 1       | 1,00    | 1          | 5   | 44,00    | 0,00 |
| 1         | 0            | #NULL! | 1      | 1      | 1      | 3,00   | 1,00       | 5          | 1       | 3,00    | 4          | 3   | 54,00    | 0,00 |
| 0         | 0            | #NULL! | 1      | #NULL! | #NULL! | 1,00   | 1,00       | 5          | 4       | 2,00    | 3          | 4   | 64,00    | 0,00 |
| 0         | 0            | #NULL! | #NULL! | #NULL! | 1      | 1,00   | 1,00       | 4          | 3       | 3,00    | 4          | 3   | 51,00    | 0,00 |
| 0         | 0            | #NULL! | #NULL! | #NULL! | 1      | 1,00   | 0,00       | 1          | 2       | 5,00    | 4          | 1   | 43,00    | 0,00 |
| 0         | 0            | 1      | #NULL! | #NULL! | #NULL! | 1,00   | 0,00       | 1          | 2       | 5,00    | 4          | 1   | 40,00    | 0,00 |
| 0         | 0            | 1      | 1      | #NULL! | #NULL! | 2,00   | 1,00       | 1          | 4       | 2,00    | 2          | 4   | 51,00    | 0,00 |
| 0         | 1            | 1      | #NULL! | #NULL! | #NULL! | 1,00   | 1,00       | 2          | 3       | 4,00    | 2          | 2   | 45,00    | 0,00 |
| 0         | 0            | 1      | 1      | #NULL! | #NULL! | 2,00   | 1,00       | 1          | 4       | 5,00    | 5          | 1   | 47,00    | 0,00 |
| 0         | 0            | #NULL! | 1      | #NULL! | #NULL! | 1,00   | 1,00       | 5          | 5       | 4,00    | 5          | 2   | 63,00    | 0,00 |
| 0         | 0            | 1      | 1      | #NULL! | 1      | 3,00   | 1,00       | 4          | 5       | 5,00    | 5          | 1   | 50,00    | 0,00 |
| 0         | 0            | 1      | 1      | #NULL! | #NULL! | 2,00   | 0,00       | 2          | 5       | 2,00    | 4          | 4   | 62,00    | 0,00 |
| 0         | 0            | #NULL! | 1      | #NULL! | #NULL! | 1,00   | 1,00       | 5          | 3       | 2,00    | 4          | 4   | 59,00    | 0,00 |
| 1         | 0            | #NULL! | 1      | #NULL! | 1      | 2,00   | 0,00       | 5          | 3       | 3,00    | 4          | 3   | 55,00    | 0,00 |
| 0         | 1            | #NULL! | #NULL! | 1      | #NULL! | 1,00   | 0,00       | 4          | 3       | 3,00    | 3          | 3   | 61,00    | 0,00 |
| 1         | 0            | 1      | 1      | #NULL! | #NULL! | 2,00   | 0,00       | 4          | 5       | 4,00    | 5          | 2   | 55,00    | 0,00 |
| 0         | 0            | 1      | 1      | 1      | #NULL! | 3,00   | 0,00       | 1          | 3       | 3,00    | 4          | 3   | 66,00    | 0,00 |
| 0         | 0            | 1      | 1      | 1      | #NULL! | 3,00   | 1,00       | 1          | 2       | 3,00    | 4          | 3   | 60,00    | 0,00 |
| 0         | 0            | #NULL! | 1      | #NULL! | #NULL! | 1,00   | 1,00       | 1          | 1       | 5,00    | 1          | 1   | 39,00    | 0,00 |
| 1         | 0            | #NULL! | #NULL! | 1      | #NULL! | 1,00   | 0,00       | 3          | 3       | 2,00    | 1          | 4   | 56,00    | 0,00 |
| 0         | 0            | #NULL! | #NULL! | #NULL! | 1      | 1,00   | 0,00       | 5          | 5       | 3,00    | 4          | 3   | 69,00    | 0,00 |
| 0         | 0            | #NULL! | 1      | #NULL! | 1      | 2,00   | 1,00       | 4          | 2       | 5,00    | 2          | 1   | 43,00    | 0,00 |
| 0         | 0            | #NULL! | #NULL! | 1      | #NULL! | 1,00   | 0,00       | 2          | 5       | 5,00    | 5          | 1   | 48,00    | 0,00 |
| 0         | 0            | #NULL! | 1      | #NULL! | #NULL! | 1,00   | 1,00       | 2          | 5       | 5,00    | 5          | 1   | 48,00    | 0,00 |
| 0         | 0            | 1      | #NULL! | #NULL! | #NULL! | 1,00   | 0,00       | 1          | 5       | 2,00    | 1          | 4   | 41,00    | 0,00 |
| 1         | 0            | 1      | 1      | #NULL! | #NULL! | 2,00   | 0,00       | 4          | 2       | 3,00    | 5          | 3   | 53,00    | 0,00 |
| 0         | 0            | #NULL! | #NULL! | 1      | #NULL! | 1,00   | 0,00       | 1          | 2       | 4,00    | 2          | 2   | 48,00    | 0,00 |
| 0         | 0            | 1      | #NULL! | #NULL! | #NULL! | 1,00   | 0,00       | 4          | 4       | 4,00    | 3          | 2   | 51,00    | 0,00 |
| 1         | 0            | #NULL! | 1      | 1      | #NULL! | 2,00   | 1,00       | 4          | 4       | 3,00    | 4          | 3   | 58,00    | 0,00 |
| 0         | 0            | 1      | #NULL! | #NULL! | #NULL! | 1,00   | 0,00       | 2          | 4       | 4,00    | 4          | 2   | 49,00    | 0,00 |
| 0         | 0            | #NULL! | 1      | 1      | 1      | 3,00   | 1,00       | 4          | 1       | 1,00    | 1          | 5   | 63,00    | 0,00 |

|   |   |        |        |        |        |        |      |      |   |      |      |   |       |       |      |
|---|---|--------|--------|--------|--------|--------|------|------|---|------|------|---|-------|-------|------|
| 0 | 0 | 1      | #NULL! | #NULL! | #NULL! | 1,00   | 1,00 | 4    | 4 | 1,00 | 1    | 5 | 52,00 | 0,00  |      |
| 0 | 0 | 1      |        | 1      | 1      | #NULL! | 3,00 | 1,00 | 1 | 1    | 5,00 | 3 | 1     | 38,00 | 0,00 |
| 0 | 0 | #NULL! |        | 1      | #NULL! | #NULL! | 1,00 | 0,00 | 1 | 5    | 5,00 | 3 | 1     | 45,00 | 0,00 |
| 0 | 0 | #NULL! |        | 1      |        | 1      | 3,00 | 0,00 | 2 | 4    | 3,00 | 1 | 3     | 51,00 | 0,00 |
| 0 | 0 | 1      |        | 1      | #NULL! | #NULL! | 2,00 | 1,00 | 1 | 4    | 4,00 | 4 | 2     | 42,00 | 0,00 |
| 1 | 0 | 1      |        | 1      | #NULL! |        | 3,00 | 1,00 | 1 | 5    | 3,00 | 4 | 3     | 52,00 | 0,00 |
| 1 | 1 | #NULL! |        | 1      | #NULL! | #NULL! | 1,00 | 1,00 | 5 | 3    | 5,00 | 1 | 1     | 60,00 | 0,00 |
| 0 | 0 | #NULL! |        | 1      | #NULL! | #NULL! | 1,00 | 1,00 | 2 | 4    | 4,00 | 4 | 2     | 53,00 | 0,00 |
| 0 | 0 | #NULL! |        | 1      | #NULL! | #NULL! | 1,00 | 0,00 | 4 | 5    | 4,00 | 2 | 2     | 57,00 | 0,00 |
| 0 | 0 | #NULL! |        | 1      |        | 1      | 3,00 | 1,00 | 4 | 1    | 1,00 | 1 | 5     | 58,00 | 0,00 |
| 0 | 0 | #NULL! |        | 1      |        | 1      | 3,00 | 1,00 | 2 | 5    | 5,00 | 1 | 1     | 56,00 | 0,00 |
| 0 | 0 | #NULL! |        | 1      |        | 1      | 3,00 | 1,00 | 2 | 5    | 1,00 | 4 | 5     | 69,00 | 0,00 |
| 0 | 0 | #NULL! |        | 1      |        | 1      | 3,00 | 1,00 | 2 | 5    | 5,00 | 3 | 1     | 56,00 | 0,00 |
| 0 | 0 | 1      | #NULL! | #NULL! | #NULL! | 1,00   | 0,00 | 5    | 4 | 5,00 | 4    | 1 | 55,00 | 0,00  |      |
| 0 | 0 | #NULL! |        | 1      |        | 1      | 2,00 | 0,00 | 1 | 4    | 3,00 | 4 | 3     | 51,00 | 0,00 |
| 0 | 0 | #NULL! |        | 1      | #NULL! | #NULL! | 1,00 | 1,00 | 2 | 4    | 4,00 | 3 | 2     | 60,00 | 0,00 |
| 0 | 0 | 1      |        | 1      | #NULL! | #NULL! | 2,00 | 1,00 | 1 | 4    | 4,00 | 4 | 2     | 56,00 | 0,00 |
| 0 | 0 | 1      |        | 1      | #NULL! | #NULL! | 2,00 | 1,00 | 4 | 2    | 5,00 | 3 | 1     | 50,00 | 0,00 |
| 0 | 0 | 1      | #NULL! | #NULL! | #NULL! | 1,00   | 0,00 | 5    | 4 | 3,00 | 2    | 3 | 57,00 | 0,00  |      |
| 0 | 0 | 1      |        | 1      | #NULL! | #NULL! | 2,00 | 0,00 | 3 | 4    | 2,00 | 3 | 4     | 58,00 | 0,00 |
| 0 | 0 | #NULL! |        | 1      | #NULL! |        | 2,00 | 0,00 | 4 | 4    | 2,00 | 3 | 4     | 62,00 | 0,00 |
| 0 | 0 | #NULL! |        | 1      |        | 1      | 3,00 | 0,00 | 4 | 4    | 4,00 | 2 | 2     | 66,00 | 0,00 |
| 0 | 0 | #NULL! |        | 1      | #NULL! |        | 2,00 | 0,00 | 4 | 4    | 2,00 | 3 | 4     | 63,00 | 0,00 |
| 1 | 0 | 1      | #NULL! | #NULL! | #NULL! | 1,00   | 1,00 | 1    | 4 | 5,00 | 5    | 1 | 52,00 | 0,00  |      |
| 0 | 0 | #NULL! |        | 1      | #NULL! | #NULL! | 1,00 | 0,00 | 1 | 2    | 5,00 | 4 | 1     | 43,00 | 0,00 |
| 1 | 0 | #NULL! |        | 1      | #NULL! | #NULL! | 1,00 | 1,00 | 5 | 2    | 3,00 | 3 | 3     | 59,00 | 0,00 |
| 0 | 0 | 1      | #NULL! | #NULL! | #NULL! | 1,00   | 0,00 | 1    | 5 | 2,00 | 4    | 4 | 54,00 | 0,00  |      |
| 0 | 0 | #NULL! |        | 1      | #NULL! | #NULL! | 1,00 | 0,00 | 2 | 5    | 5,00 | 5 | 1     | 46,00 | 0,00 |
| 0 | 0 | #NULL! |        | 1      | #NULL! | #NULL! | 1,00 | 1,00 | 2 | 3    | 4,00 | 2 | 2     | 43,00 | 0,00 |
| 1 | 0 | #NULL! | #NULL! |        | 1      | #NULL! | 1,00 | 1,00 | 1 | 5    | 5,00 | 1 | 1     | 43,00 | 0,00 |
| 1 | 0 | #NULL! | #NULL! |        | 1      | #NULL! | 1,00 | 1,00 | 2 | 4    | 4,00 | 3 | 2     | 53,00 | 0,00 |
| 0 | 0 | 1      |        | 1      | #NULL! | #NULL! | 2,00 | 1,00 | 2 | 3    | 5,00 | 5 | 1     | 60,00 | 0,00 |
| 0 | 0 | #NULL! |        | 1      | #NULL! | #NULL! | 1,00 | 0,00 | 1 | 5    | 5,00 | 4 | 1     | 43,00 | 0,00 |

|   |   |        |        |        |        |      |      |   |   |      |   |   |       |      |
|---|---|--------|--------|--------|--------|------|------|---|---|------|---|---|-------|------|
| 1 | 0 | #NULL! | 1      | #NULL! | #NULL! | 1,00 | 1,00 | 3 | 3 | 1,00 | 5 | 5 | 61,00 | 0,00 |
| 0 | 0 | #NULL! | 1      | #NULL! | #NULL! | 1,00 | 0,00 | 1 | 5 | 5,00 | 5 | 1 | 44,00 | 0,00 |
| 0 | 0 | #NULL! | 1      | #NULL! | #NULL! | 1,00 | 0,00 | 4 | 4 | 3,00 | 4 | 3 | 68,00 | 0,00 |
| 0 | 0 | #NULL! | #NULL! | 1      | #NULL! | 1,00 | 0,00 | 5 | 1 | 5,00 | 1 | 1 | 52,00 | 0,00 |
| 0 | 0 | 1      | 1      | #NULL! | #NULL! | 2,00 | 1,00 | 4 | 4 | 2,00 | 3 | 4 | 53,00 | 0,00 |
| 0 | 0 | #NULL! | 1      | #NULL! | #NULL! | 1,00 | 1,00 | 1 | 3 | 5,00 | 5 | 1 | 49,00 | 0,00 |
| 0 | 0 | #NULL! | 1      | #NULL! | #NULL! | 1,00 | 1,00 | 5 | 5 | 3,00 | 5 | 3 | 66,00 | 0,00 |
| 1 | 0 | 1      | #NULL! | 1      | #NULL! | 2,00 | 0,00 | 2 | 5 | 5,00 | 1 | 1 | 47,00 | 0,00 |
| 0 | 0 | #NULL! | 1      | #NULL! | #NULL! | 1,00 | 1,00 | 2 | 5 | 1,00 | 1 | 5 | 50,00 | 0,00 |
| 0 | 0 | #NULL! | #NULL! | #NULL! | 1      | 1,00 | 0,00 | 4 | 4 | 1,00 | 2 | 5 | 58,00 | 0,00 |
| 0 | 0 | #NULL! | 1      | #NULL! | #NULL! | 1,00 | 0,00 | 4 | 3 | 3,00 | 5 | 3 | 63,00 | 0,00 |
| 0 | 0 | #NULL! | 1      | #NULL! | #NULL! | 1,00 | 0,00 | 5 | 4 | 5,00 | 5 | 1 | 50,00 | 0,00 |
| 0 | 0 | #NULL! | 1      | #NULL! | #NULL! | 1,00 | 1,00 | 4 | 2 | 3,00 | 5 | 3 | 63,00 | 0,00 |
| 0 | 0 | #NULL! | 1      | 1      | #NULL! | 2,00 | 0,00 | 4 | 2 | 3,00 | 4 | 3 | 65,00 | 0,00 |
| 1 | 0 | 1      | #NULL! | #NULL! | #NULL! | 1,00 | 0,00 | 4 | 3 | 3,00 | 5 | 3 | 56,00 | 0,00 |
| 0 | 0 | #NULL! | #NULL! | #NULL! | 1      | 1,00 | 1,00 | 4 | 3 | 2,00 | 5 | 4 | 71,00 | 0,00 |
| 0 | 0 | #NULL! | 1      | #NULL! | #NULL! | 1,00 | 0,00 | 5 | 5 | 1,00 | 4 | 5 | 69,00 | 0,00 |
| 0 | 0 | #NULL! | 1      | #NULL! | #NULL! | 1,00 | 0,00 | 5 | 5 | 5,00 | 5 | 1 | 55,00 | 0,00 |
| 0 | 0 | #NULL! | 1      | #NULL! | #NULL! | 1,00 | 0,00 | 5 | 5 | 3,00 | 3 | 3 | 62,00 | 0,00 |
| 0 | 0 | #NULL! | 1      | #NULL! | #NULL! | 1,00 | 0,00 | 5 | 5 | 5,00 | 5 | 1 | 62,00 | 0,00 |
| 0 | 0 | #NULL! | 1      | #NULL! | #NULL! | 1,00 | 0,00 | 5 | 5 | 1,00 | 2 | 5 | 59,00 | 0,00 |
| 0 | 0 | 1      | #NULL! | #NULL! | #NULL! | 1,00 | 1,00 | 4 | 4 | 4,00 | 4 | 2 | 55,00 | 0,00 |
| 0 | 0 | #NULL! | 1      | #NULL! | #NULL! | 1,00 | 0,00 | 3 | 4 | 1,00 | 5 | 5 | 68,00 | 0,00 |
| 0 | 0 | #NULL! | 1      | #NULL! | #NULL! | 1,00 | 1,00 | 4 | 4 | 3,00 | 3 | 3 | 56,00 | 0,00 |
| 0 | 0 | #NULL! | #NULL! | #NULL! | 1      | 1,00 | 0,00 | 4 | 4 | 2,00 | 5 | 4 | 68,00 | 0,00 |
| 0 | 0 | #NULL! | 1      | #NULL! | #NULL! | 1,00 | 1,00 | 4 | 4 | 2,00 | 4 | 4 | 60,00 | 0,00 |
| 0 | 0 | #NULL! | 1      | 1      | 1      | 3,00 | 1,00 | 4 | 2 | 3,00 | 2 | 3 | 51,00 | 0,00 |
| 0 | 0 | 1      | #NULL! | #NULL! | #NULL! | 1,00 | 1,00 | 1 | 3 | 3,00 | 3 | 3 | 56,00 | 0,00 |
| 0 | 0 | #NULL! | 1      | #NULL! | #NULL! | 1,00 | 1,00 | 3 | 4 | 1,00 | 4 | 5 | 57,00 | 0,00 |
| 0 | 0 | #NULL! | 1      | #NULL! | #NULL! | 1,00 | 1,00 | 5 | 5 | 5,00 | 5 | 1 | 74,00 | 0,00 |
| 0 | 0 | #NULL! | 1      | #NULL! | #NULL! | 1,00 | 1,00 | 1 | 5 | 2,00 | 5 | 4 | 64,00 | 0,00 |
| 0 | 0 | #NULL! | 1      | #NULL! | #NULL! | 1,00 | 0,00 | 4 | 5 | 3,00 | 4 | 3 | 65,00 | 0,00 |
| 0 | 0 | #NULL! | 1      | #NULL! | #NULL! | 1,00 | 0,00 | 1 | 4 | 3,00 | 1 | 3 | 52,00 | 0,00 |

|   |   |        |        |        |        |      |      |   |   |      |   |   |       |      |
|---|---|--------|--------|--------|--------|------|------|---|---|------|---|---|-------|------|
| 0 | 0 | #NULL! | 1      | #NULL! | #NULL! | 1,00 | 1,00 | 2 | 5 | 4,00 | 2 | 2 | 51,00 | 0,00 |
| 0 | 0 | #NULL! | 1      | #NULL! | #NULL! | 1,00 | 1,00 | 5 | 5 | 1,00 | 5 | 5 | 67,00 | 0,00 |
| 0 | 0 | #NULL! | 1      | #NULL! | #NULL! | 1,00 | 1,00 | 3 | 5 | 5,00 | 5 | 1 | 57,00 | 0,00 |
| 0 | 0 | 1      | #NULL! | #NULL! | #NULL! | 1,00 | 1,00 | 1 | 3 | 3,00 | 1 | 3 | 45,00 | 0,00 |
| 1 | 0 | #NULL! | 1      | #NULL! | #NULL! | 1,00 | 1,00 | 4 | 4 | 3,00 | 4 | 3 | 61,00 | 0,00 |
| 0 | 0 | #NULL! | 1      | #NULL! | #NULL! | 1,00 | 0,00 | 5 | 5 | 5,00 | 5 | 1 | 57,00 | 0,00 |
| 0 | 0 | #NULL! | 1      | #NULL! | #NULL! | 1,00 | 1,00 | 5 | 2 | 5,00 | 5 | 1 | 58,00 | 0,00 |
| 0 | 0 | #NULL! | #NULL! | 1      | #NULL! | 1,00 | 0,00 | 4 | 2 | 3,00 | 3 | 3 | 58,00 | 0,00 |
| 0 | 0 | #NULL! | 1      | #NULL! | #NULL! | 1,00 | 1,00 | 1 | 3 | 4,00 | 5 | 2 | 63,00 | 0,00 |
| 1 | 0 | #NULL! | 1      | 1      | 1      | 3,00 | 1,00 | 1 | 2 | 1,00 | 3 | 5 | 58,00 | 0,00 |
| 0 | 0 | #NULL! | 1      | #NULL! | #NULL! | 1,00 | 0,00 | 3 | 3 | 1,00 | 5 | 5 | 58,00 | 0,00 |
| 0 | 0 | #NULL! | 1      | #NULL! | #NULL! | 1,00 | 1,00 | 5 | 5 | 5,00 | 2 | 1 | 45,00 | 0,00 |
| 0 | 0 | #NULL! | 1      | #NULL! | #NULL! | 1,00 | 1,00 | 5 | 4 | 2,00 | 4 | 4 | 64,00 | 0,00 |
| 0 | 0 | #NULL! | 1      | #NULL! | #NULL! | 1,00 | 0,00 | 2 | 5 | 4,00 | 2 | 2 | 53,00 | 0,00 |
| 0 | 0 | 1      | #NULL! | #NULL! | #NULL! | 1,00 | 1,00 | 1 | 3 | 1,00 | 5 | 5 | 55,00 | 0,00 |
| 0 | 0 | #NULL! | 1      | #NULL! | #NULL! | 1,00 | 1,00 | 2 | 4 | 5,00 | 5 | 1 | 47,00 | 0,00 |
| 0 | 0 | #NULL! | 1      | 1      | #NULL! | 2,00 | 0,00 | 4 | 4 | 2,00 | 5 | 4 | 63,00 | 0,00 |
| 0 | 0 | #NULL! | 1      | #NULL! | #NULL! | 1,00 | 1,00 | 4 | 4 | 3,00 | 3 | 3 | 52,00 | 0,00 |
| 0 | 0 | #NULL! | #NULL! | 1      | #NULL! | 1,00 | 0,00 | 4 | 5 | 1,00 | 1 | 5 | 64,00 | 0,00 |
| 0 | 0 | #NULL! | 1      | #NULL! | #NULL! | 1,00 | 1,00 | 1 | 1 | 3,00 | 1 | 3 | 39,00 | 0,00 |
| 0 | 0 | #NULL! | 1      | #NULL! | #NULL! | 1,00 | 1,00 | 1 | 5 | 5,00 | 3 | 1 | 50,00 | 0,00 |
| 0 | 0 | #NULL! | 1      | 1      | #NULL! | 2,00 | 1,00 | 5 | 3 | 5,00 | 4 | 1 | 58,00 | 0,00 |
| 0 | 0 | #NULL! | 1      | #NULL! | #NULL! | 1,00 | 1,00 | 1 | 1 | 5,00 | 1 | 1 | 31,00 | 0,00 |
| 0 | 0 | #NULL! | 1      | #NULL! | #NULL! | 1,00 | 0,00 | 3 | 2 | 3,00 | 5 | 3 | 47,00 | 0,00 |
| 0 | 0 | #NULL! | 1      | #NULL! | #NULL! | 1,00 | 1,00 | 2 | 5 | 3,00 | 3 | 3 | 57,00 | 0,00 |
| 0 | 0 | 1      | 1      | #NULL! | #NULL! | 2,00 | 1,00 | 4 | 4 | 5,00 | 4 | 1 | 52,00 | 0,00 |
| 0 | 0 | #NULL! | 1      | #NULL! | #NULL! | 1,00 | 1,00 | 5 | 3 | 3,00 | 5 | 3 | 57,00 | 0,00 |
| 1 | 1 | #NULL! | 1      | #NULL! | #NULL! | 1,00 | 0,00 | 5 | 5 | 4,00 | 2 | 2 | 51,00 | 0,00 |
| 1 | 0 | #NULL! | #NULL! | #NULL! | 1      | 1,00 | 1,00 | 1 | 4 | 5,00 | 4 | 1 | 54,00 | 0,00 |
| 0 | 0 | #NULL! | 1      | #NULL! | #NULL! | 1,00 | 0,00 | 3 | 5 | 3,00 | 2 | 3 | 52,00 | 0,00 |
| 1 | 1 | #NULL! | 1      | #NULL! | #NULL! | 1,00 | 0,00 | 1 | 5 | 3,00 | 2 | 3 | 46,00 | 0,00 |
| 0 | 0 | #NULL! | 1      | 1      | #NULL! | 2,00 | 1,00 | 1 | 1 | 5,00 | 1 | 1 | 35,00 | 0,00 |
| 0 | 0 | #NULL! | 1      | #NULL! | 1      | 2,00 | 1,00 | 5 | 5 | 1,00 | 5 | 5 | 60,00 | 0,00 |

|   |   |        |        |        |        |        |      |      |   |      |      |   |       |       |      |
|---|---|--------|--------|--------|--------|--------|------|------|---|------|------|---|-------|-------|------|
| 1 | 0 | 1      | #NULL! | #NULL! | #NULL! | 1,00   | 1,00 | 2    | 1 | 5,00 | 5    | 1 | 58,00 | 0,00  |      |
| 0 | 0 | 1      |        | 1      | #NULL! | #NULL! | 2,00 | 0,00 | 4 | 4    | 2,00 | 1 | 4     | 61,00 | 0,00 |
| 0 | 0 | #NULL! |        | 1      | #NULL! | #NULL! | 1,00 | 1,00 | 3 | 1    | 1,00 | 1 | 5     | 49,00 | 0,00 |
| 0 | 0 | 1      |        | 1      | #NULL! |        | 3,00 | 1,00 | 1 | 5    | 2,00 | 5 | 4     | 48,00 | 0,00 |
| 0 | 0 | #NULL! | #NULL! | #NULL! |        |        | 1,00 | 0,00 | 5 | 5    | 3,00 | 3 | 3     | 69,00 | 0,00 |
| 0 | 0 | #NULL! |        | 1      | #NULL! | #NULL! | 1,00 | 0,00 | 4 | 5    | 1,00 | 5 | 5     | 78,00 | 0,00 |
| 0 | 0 | #NULL! |        | 1      | #NULL! | #NULL! | 1,00 | 1,00 | 5 | 3    | 1,00 | 4 | 5     | 54,00 | 0,00 |
| 0 | 0 | #NULL! |        | 1      | #NULL! | #NULL! | 1,00 | 0,00 | 2 | 5    | 2,00 | 4 | 4     | 57,00 | 0,00 |
| 0 | 0 | #NULL! |        | 1      | #NULL! | #NULL! | 1,00 | 1,00 | 2 | 4    | 4,00 | 2 | 2     | 48,00 | 0,00 |
| 0 | 1 | #NULL! |        | 1      | #NULL! | #NULL! | 1,00 | 0,00 | 1 | 5    | 3,00 | 4 | 3     | 52,00 | 0,00 |
| 0 | 0 | 1      |        | 1      | #NULL! | #NULL! | 1,00 | 0,00 | 1 | 4    | 2,00 | 1 | 4     | 43,00 | 0,00 |
| 0 | 0 | #NULL! |        | 1      |        | 1      | 3,00 | 0,00 | 1 | 3    | 4,00 | 4 | 2     | 53,00 | 0,00 |
| 0 | 0 | 1      | #NULL! | #NULL! | #NULL! |        | 1,00 | 0,00 | 4 | 4    | 5,00 | 5 | 1     | 58,00 | 0,00 |
| 1 | 0 | 1      |        | 1      | #NULL! | #NULL! | 2,00 | 1,00 | 1 | 1    | 1,00 | 1 | 5     | 53,00 | 0,00 |
| 0 | 0 | 1      |        | 1      | #NULL! | #NULL! | 2,00 | 1,00 | 2 | 4    | 1,00 | 5 | 5     | 56,00 | 0,00 |
| 0 | 0 | #NULL! |        | 1      |        | 1      | 3,00 | 1,00 | 4 | 2    | 3,00 | 4 | 3     | 57,00 | 0,00 |
| 0 | 0 | #NULL! |        | 1      | #NULL! | #NULL! | 1,00 | 1,00 | 1 | 3    | 3,00 | 5 | 3     | 58,00 | 0,00 |
| 0 | 0 | 1      |        | 1      | #NULL! | #NULL! | 2,00 | 0,00 | 2 | 4    | 2,00 | 5 | 4     | 59,00 | 0,00 |
| 0 | 0 | #NULL! |        | 1      | #NULL! | #NULL! | 1,00 | 1,00 | 2 | 4    | 2,00 | 4 | 4     | 64,00 | 0,00 |
| 0 | 0 | #NULL! |        | 1      | #NULL! | #NULL! | 1,00 | 1,00 | 2 | 4    | 4,00 | 5 | 2     | 54,00 | 0,00 |
| 0 | 0 | 1      |        | 1      | #NULL! | #NULL! | 2,00 | 1,00 | 2 | 3    | 3,00 | 2 | 3     | 50,00 | 0,00 |
| 0 | 0 | #NULL! |        | 1      | #NULL! | #NULL! | 1,00 | 1,00 | 5 | 1    | 1,00 | 5 | 5     | 65,00 | 0,00 |
| 0 | 0 | #NULL! | #NULL! |        |        | 1      | 1,00 | 1,00 | 5 | 5    | 1,00 | 5 | 5     | 78,00 | 0,00 |
| 0 | 0 | #NULL! | #NULL! | #NULL! |        |        | 1,00 | 1,00 | 3 | 1    | 3,00 | 5 | 3     | 55,00 | 0,00 |
| 0 | 0 | #NULL! |        | 1      | #NULL! |        | 2,00 | 1,00 | 2 | 3    | 5,00 | 1 | 1     | 42,00 | 0,00 |
| 1 | 1 | 1      |        | 1      | #NULL! |        | 3,00 | 1,00 | 4 | 4    | 1,00 | 1 | 5     | 53,00 | 0,00 |
| 0 | 0 | #NULL! |        | 1      |        | 1      | 3,00 | 0,00 | 4 | 4    | 3,00 | 5 | 3     | 65,00 | 0,00 |
| 0 | 0 | #NULL! |        | 1      |        | 1      | 3,00 | 1,00 | 5 | 5    | 2,00 | 4 | 4     | 63,00 | 0,00 |
| 0 | 0 | 1      | #NULL! | #NULL! |        |        | 2,00 | 1,00 | 3 | 3    | 3,00 | 5 | 3     | 63,00 | 0,00 |
| 0 | 0 | #NULL! |        | 1      | #NULL! | #NULL! | 1,00 | 0,00 | 2 | 5    | 5,00 | 5 | 1     | 51,00 | 0,00 |
| 0 | 0 | 1      | #NULL! | #NULL! | #NULL! |        | 1,00 | 0,00 | 1 | 4    | 5,00 | 5 | 1     | 43,00 | 0,00 |
| 0 | 0 | 1      |        | 1      | #NULL! | #NULL! | 2,00 | 0,00 | 1 | 5    | 1,00 | 1 | 5     | 44,00 | 0,00 |
| 1 | 0 | #NULL! |        | 1      |        | 1      | 2,00 | 1,00 | 1 | 5    | 3,00 | 3 | 3     | 54,00 | 0,00 |

|   |   |        |        |        |        |        |        |      |      |      |      |      |       |       |       |       |      |
|---|---|--------|--------|--------|--------|--------|--------|------|------|------|------|------|-------|-------|-------|-------|------|
| 0 | 0 | 1      | #NULL! | #NULL! | #NULL! | 1,00   | 1,00   | 1    | 5    | 1,00 | 3    | 5    | 57,00 | 0,00  |       |       |      |
| 1 | 0 | 1      |        | 1      | #NULL! | #NULL! | 2,00   | 1,00 | 2    | 4    | 3,00 | 5    | 3     | 59,00 | 0,00  |       |      |
| 1 | 0 | #NULL! |        | 1      |        | 1      | #NULL! | 2,00 | 1,00 | 4    | 3    | 3,00 | 2     | 3     | 58,00 | 0,00  |      |
| 0 | 0 | 1      | #NULL! | #NULL! | #NULL! | 1,00   | 0,00   | 1    | 5    | 4,00 | 4    | 2    | 52,00 | 0,00  |       |       |      |
| 1 | 1 | 1      | #NULL! | #NULL! | #NULL! | 1,00   | 1,00   | 4    | 5    | 3,00 | 5    | 3    | 59,00 | 0,00  |       |       |      |
| 0 | 0 | #NULL! |        | 1      | #NULL! | #NULL! | 1,00   | 1,00 | 4    | 4    | 3,00 | 4    | 3     | 54,00 | 0,00  |       |      |
| 1 | 1 | #NULL! |        | 1      | #NULL! | #NULL! | 1,00   | 1,00 | 4    | 4    | 4,00 | 4    | 2     | 52,00 | 0,00  |       |      |
| 0 | 0 | 1      |        | 1      | #NULL! | #NULL! | 2,00   | 0,00 | 4    | 4    | 2,00 | 5    | 4     | 73,00 | 0,00  |       |      |
| 0 | 0 | #NULL! | #NULL! |        | 1      | #NULL! | 1,00   | 1,00 | 3    | 2    | 1,00 | 3    | 5     | 58,00 | 0,00  |       |      |
| 1 | 0 | 1      | #NULL! | #NULL! | #NULL! | 1,00   | 1,00   | 4    | 3    | 4,00 | 4    | 2    | 53,00 | 0,00  |       |       |      |
| 0 | 0 | #NULL! |        | 1      | #NULL! | #NULL! | 1,00   | 0,00 | 4    | 5    | 2,00 | 5    | 4     | 79,00 | 0,00  |       |      |
| 0 | 0 | #NULL! |        | 1      | #NULL! | #NULL! | 1,00   | 1,00 | 4    | 3    | 2,00 | 4    | 4     | 60,00 | 0,00  |       |      |
| 1 | 0 | 1      |        | 1      | #NULL! |        | 1      | 3,00 | 0,00 | 1    | 4    | 2,00 | 4     | 4     | 59,00 | 0,00  |      |
| 0 | 0 | #NULL! |        | 1      |        | 1      |        | 1    | 3,00 | 0,00 | 5    | 2    | 1,00  | 5     | 5     | 72,00 | 0,00 |
| 0 | 0 | #NULL! |        | 1      | #NULL! | #NULL! | 1,00   | 1,00 | 2    | 4    | 5,00 | 5    | 1     | 55,00 | 0,00  |       |      |
| 1 | 1 | 1      | #NULL! | #NULL! | #NULL! | 1,00   | 1,00   | 4    | 2    | 2,00 | 4    | 4    | 4     | 61,00 | 0,00  |       |      |
| 0 | 0 | 1      |        | 1      | #NULL! | #NULL! | 2,00   | 0,00 | 4    | 5    | 2,00 | 4    | 4     | 57,00 | 0,00  |       |      |
| 1 | 0 | 1      | #NULL! | #NULL! | #NULL! | 1,00   | 0,00   | 4    | 1    | 3,00 | 3    | 3    | 63,00 | 0,00  |       |       |      |
| 1 | 0 | 1      | #NULL! | #NULL! | #NULL! | 1,00   | 1,00   | 3    | 4    | 4,00 | 1    | 2    | 54,00 | 0,00  |       |       |      |
| 0 | 0 | #NULL! |        | 1      | #NULL! |        | 1      | 2,00 | 1,00 | 2    | 1    | 5,00 | 2     | 1     | 51,00 | 0,00  |      |
| 1 | 0 | 1      |        | 1      | #NULL! |        | 1      | 3,00 | 0,00 | 4    | 4    | 5,00 | 2     | 1     | 57,00 | 0,00  |      |
| 1 | 1 | 1      |        | 1      | #NULL! | #NULL! | 2,00   | 0,00 | 4    | 4    | 5,00 | 5    | 1     | 53,00 | 0,00  |       |      |
| 0 | 0 | #NULL! |        | 1      | #NULL! | #NULL! | 1,00   | 0,00 | 4    | 5    | 1,00 | 5    | 5     | 56,00 | 0,00  |       |      |
| 0 | 0 | #NULL! |        | 1      | #NULL! | #NULL! | 1,00   | 0,00 | 5    | 1    | 5,00 | 2    | 1     | 44,00 | 0,00  |       |      |
| 0 | 0 | #NULL! |        | 1      | #NULL! | #NULL! | 1,00   | 0,00 | 5    | 1    | 5,00 | 2    | 1     | 42,00 | 0,00  |       |      |
| 0 | 0 | #NULL! |        | 1      | #NULL! | #NULL! | 1,00   | 1,00 | 1    | 5    | 4,00 | 4    | 2     | 49,00 | 0,00  |       |      |
| 1 | 0 | 1      |        | 1      | #NULL! | #NULL! | 2,00   | 1,00 | 5    | 5    | 5,00 | 5    | 1     | 50,00 | 0,00  |       |      |
| 0 | 0 | 1      |        | 1      | #NULL! |        | 1      | 3,00 | 1,00 | 2    | 2    | 4,00 | 1     | 2     | 51,00 | 0,00  |      |
| 0 | 0 | #NULL! |        | 1      | #NULL! | #NULL! | 1,00   | 0,00 | 1    | 4    | 5,00 | 3    | 1     | 46,00 | 0,00  |       |      |
| 0 | 0 | #NULL! |        | 1      | #NULL! | #NULL! | 1,00   | 0,00 | 5    | 5    | 2,00 | 5    | 4     | 76,00 | 0,00  |       |      |
| 0 | 0 | #NULL! |        | 1      | #NULL! | #NULL! | 1,00   | 1,00 | 1    | 1    | 2,00 | 5    | 4     | 71,00 | 0,00  |       |      |
| 1 | 0 | #NULL! |        | 1      | #NULL! |        | 1      | 2,00 | 1,00 | 5    | 2    | 1,00 | 1     | 5     | 56,00 | 0,00  |      |
| 0 | 0 | 1      | #NULL! | #NULL! | #NULL! | 1,00   | 1,00   | 4    | 4    | 3,00 | 4    | 3    | 52,00 | 0,00  |       |       |      |

|   |   |        |        |        |        |      |      |   |   |      |   |   |       |      |
|---|---|--------|--------|--------|--------|------|------|---|---|------|---|---|-------|------|
| 0 | 0 | #NULL! | 1      | #NULL! | #NULL! | 1,00 | 1,00 | 1 | 3 | 1,00 | 1 | 5 | 47,00 | 0,00 |
| 0 | 0 | #NULL! | 1      | #NULL! | #NULL! | 1,00 | 1,00 | 5 | 4 | 3,00 | 1 | 3 | 65,00 | 0,00 |
| 0 | 0 | 1      | #NULL! | #NULL! | #NULL! | 1,00 | 1,00 | 2 | 4 | 3,00 | 2 | 3 | 46,00 | 0,00 |
| 1 | 0 | 1      | 1      | #NULL! | #NULL! | 2,00 | 1,00 | 2 | 1 | 3,00 | 1 | 3 | 44,00 | 0,00 |
| 0 | 0 | #NULL! | 1      | #NULL! | #NULL! | 1,00 | 0,00 | 1 | 5 | 5,00 | 5 | 1 | 48,00 | 0,00 |
| 0 | 0 | 1      | 1      | #NULL! | 1      | 3,00 | 1,00 | 1 | 5 | 5,00 | 1 | 1 | 47,00 | 0,00 |
| 0 | 0 | 1      | 1      | #NULL! | #NULL! | 2,00 | 0,00 | 3 | 5 | 2,00 | 1 | 4 | 47,00 | 0,00 |
| 0 | 0 | #NULL! | 1      | #NULL! | #NULL! | 1,00 | 0,00 | 4 | 5 | 3,00 | 5 | 3 | 60,00 | 0,00 |
| 0 | 0 | #NULL! | 1      | 1      | #NULL! | 2,00 | 1,00 | 4 | 3 | 1,00 | 1 | 5 | 49,00 | 0,00 |
| 0 | 0 | #NULL! | 1      | #NULL! | #NULL! | 1,00 | 1,00 | 1 | 1 | 3,00 | 1 | 3 | 56,00 | 0,00 |
| 0 | 0 | #NULL! | 1      | #NULL! | #NULL! | 1,00 | 1,00 | 1 | 1 | 3,00 | 1 | 3 | 48,00 | 0,00 |
| 0 | 0 | 1      | 1      | #NULL! | #NULL! | 2,00 | 0,00 | 3 | 2 | 5,00 | 5 | 1 | 49,00 | 0,00 |
| 0 | 0 | 1      | #NULL! | #NULL! | #NULL! | 1,00 | 1,00 | 1 | 4 | 1,00 | 1 | 5 | 48,00 | 0,00 |
| 0 | 0 | 1      | #NULL! | #NULL! | #NULL! | 1,00 | 1,00 | 2 | 1 | 3,00 | 1 | 3 | 44,00 | 0,00 |
| 0 | 0 | #NULL! | 1      | #NULL! | #NULL! | 1,00 | 1,00 | 1 | 1 | 5,00 | 5 | 1 | 48,00 | 0,00 |
| 0 | 0 | #NULL! | 1      | #NULL! | 1      | 2,00 | 1,00 | 4 | 5 | 1,00 | 5 | 5 | 67,00 | 0,00 |
| 0 | 0 | 1      | #NULL! | #NULL! | #NULL! | 1,00 | 1,00 | 5 | 5 | 5,00 | 4 | 1 | 52,00 | 0,00 |
| 0 | 0 | #NULL! | 1      | #NULL! | #NULL! | 1,00 | 0,00 | 1 | 5 | 5,00 | 4 | 1 | 42,00 | 0,00 |
| 0 | 0 | 1      | 1      | #NULL! | #NULL! | 2,00 | 0,00 | 4 | 5 | 1,00 | 5 | 5 | 65,00 | 0,00 |
| 0 | 0 | 1      | 1      | #NULL! | #NULL! | 2,00 | 0,00 | 4 | 5 | 1,00 | 5 | 5 | 70,00 | 0,00 |
| 0 | 0 | #NULL! | 1      | #NULL! | #NULL! | 1,00 | 1,00 | 5 | 5 | 1,00 | 2 | 5 | 73,00 | 0,00 |
| 0 | 0 | #NULL! | 1      | 1      | #NULL! | 2,00 | 1,00 | 4 | 5 | 5,00 | 5 | 1 | 51,00 | 0,00 |
| 0 | 0 | #NULL! | #NULL! | #NULL! | 1      | 1,00 | 0,00 | 4 | 2 | 3,00 | 4 | 3 | 62,00 | 0,00 |
| 0 | 0 | #NULL! | 1      | #NULL! | #NULL! | 1,00 | 0,00 | 4 | 4 | 5,00 | 5 | 1 | 51,00 | 0,00 |
| 0 | 0 | #NULL! | 1      | #NULL! | #NULL! | 1,00 | 0,00 | 3 | 4 | 5,00 | 4 | 1 | 49,00 | 0,00 |
| 0 | 0 | #NULL! | 1      | #NULL! | #NULL! | 1,00 | 0,00 | 2 | 4 | 5,00 | 5 | 1 | 64,00 | 0,00 |
| 0 | 0 | #NULL! | #NULL! | 1      | 1      | 2,00 | 0,00 | 1 | 5 | 5,00 | 1 | 1 | 47,00 | 0,00 |
| 1 | 1 | #NULL! | 1      | #NULL! | #NULL! | 1,00 | 1,00 | 2 | 5 | 1,00 | 5 | 5 | 66,00 | 0,00 |
| 0 | 0 | #NULL! | 1      | #NULL! | #NULL! | 1,00 | 1,00 | 2 | 5 | 5,00 | 5 | 1 | 45,00 | 0,00 |
| 1 | 0 | #NULL! | 1      | #NULL! | #NULL! | 1,00 | 0,00 | 4 | 5 | 3,00 | 5 | 3 | 62,00 | 0,00 |
| 0 | 0 | #NULL! | 1      | #NULL! | #NULL! | 1,00 | 1,00 | 2 | 4 | 3,00 | 3 | 3 | 61,00 | 0,00 |
| 0 | 0 | #NULL! | 1      | #NULL! | #NULL! | 1,00 | 0,00 | 1 | 4 | 5,00 | 1 | 1 | 54,00 | 0,00 |
| 0 | 0 | 1      | #NULL! | #NULL! | #NULL! | 1,00 | 0,00 | 1 | 4 | 5,00 | 2 | 1 | 55,00 | 0,00 |

|   |   |        |        |        |        |        |        |      |      |      |      |      |        |        |       |      |
|---|---|--------|--------|--------|--------|--------|--------|------|------|------|------|------|--------|--------|-------|------|
| 0 | 0 | 1      | #NULL! | #NULL! | #NULL! | 1,00   | 0,00   | 1    | 5    | 4,00 | 4    | 2    | 50,00  | 0,00   |       |      |
| 0 | 0 | #NULL! |        | 1      | #NULL! | #NULL! | 1,00   | 1,00 | 5    | 4    | 4,00 | 2    | 2      | 64,00  | 0,00  |      |
| 1 | 0 | 1      | #NULL! | #NULL! | #NULL! | 1,00   | 0,00   | 4    | 4    | 4,00 | 4    | 2    | 45,00  | 0,00   |       |      |
| 0 | 0 | #NULL! |        | 1      | #NULL! |        | 2,00   | 0,00 | 2    | 2    | 3,00 | 3    | 3      | 62,00  | 0,00  |      |
| 1 | 0 | 1      | #NULL! | #NULL! | #NULL! | 1,00   | 1,00   | 1    | 4    | 3,00 | 2    | 3    | 46,00  | 0,00   |       |      |
| 0 | 0 | 1      |        | 1      |        | 1      | #NULL! | 3,00 | 1,00 | 1    | 1    | 1    | 5      | 49,00  | 0,00  |      |
| 0 | 0 | 1      | #NULL! | #NULL! | #NULL! | 1,00   | 1,00   | 1    | 3    | 3,00 | 4    | 3    | 49,00  | 0,00   |       |      |
| 0 | 0 | 1      |        | 1      | #NULL! | #NULL! | 2,00   | 1,00 | 2    | 4    | 5,00 | 2    | 1      | #NULL! | 1,00  |      |
| 0 | 0 | 1      |        | 1      | #NULL! | #NULL! | 2,00   | 1,00 | 1    | 5    | 5,00 | 1    | 1      | #NULL! | 1,00  |      |
| 0 | 0 | #NULL! | #NULL! |        | 1      | #NULL! | 1,00   | 0,00 | 4    | 2    | 4,00 | 3    | 2      | #NULL! | 1,00  |      |
| 0 | 0 | #NULL! |        | 1      | #NULL! | #NULL! | 1,00   | 1,00 | 2    | 2    | 4,00 | 4    | 2      | #NULL! | 1,00  |      |
| 1 | 1 | 1      |        | 1      | #NULL! | #NULL! | 2,00   | 1,00 | 2    | 4    | 3,00 | 4    | 3      | #NULL! | 1,00  |      |
| 0 | 0 | 1      |        | 1      | #NULL! | #NULL! | 2,00   | 0,00 | 1    | 3    | 5,00 | 4    | 1      | #NULL! | 1,00  |      |
| 0 | 0 | 1      | #NULL! | #NULL! | #NULL! | 1,00   | 1,00   | 3    | 4    | 5,00 | 2    | 1    | #NULL! | 1,00   |       |      |
| 0 | 0 | 1      |        | 1      | #NULL! | #NULL! | 2,00   | 0,00 | 1    | 5    | 5,00 | 4    | 1      | #NULL! | 1,00  |      |
| 0 | 0 | 1      | #NULL! | #NULL! | #NULL! | 1,00   | 1,00   | 2    | 1    | 5,00 | 2    | 1    | #NULL! | 1,00   |       |      |
| 1 | 0 | #NULL! | #NULL! |        | 1      | #NULL! | 1,00   | 1,00 | 1    | 3    | 5,00 | 1    | 1      | #NULL! | 1,00  |      |
| 0 | 0 | 1      |        | 1      |        | 1      |        | 4,00 | 1,00 | 5    | 2    | 3    | 4      | 64,00  | 0,00  |      |
| 0 | 0 | 1      |        | 1      |        | 1      |        | 4,00 | 1,00 | 1    | 3    | 3,00 | 5      | 3      | 62,00 | 0,00 |
| 0 | 1 | 1      |        | 1      |        | 1      |        | 4,00 | 1,00 | 5    | 3    | 1,00 | 1      | 5      | 59,00 | 0,00 |
| 1 | 0 | 1      |        | 1      |        | 1      |        | 4,00 | 0,00 | 5    | 5    | 2,00 | 5      | 4      | 72,00 | 0,00 |
| 0 | 0 | 1      |        | 1      |        | 1      |        | 4,00 | 1,00 | 1    | 4    | 3,00 | 4      | 3      | 62,00 | 0,00 |
| 1 | 0 | 1      |        | 1      |        | 1      |        | 4,00 | 0,00 | 1    | 5    | 1,00 | 5      | 5      | 74,00 | 0,00 |
| 0 | 0 | 1      |        | 1      |        | 1      |        | 4,00 | 1,00 | 1    | 4    | 5,00 | 2      | 1      | 46,00 | 0,00 |
| 1 | 0 | 1      |        | 1      |        | 1      |        | 4,00 | 0,00 | 4    | 4    | 2,00 | 3      | 4      | 68,00 | 0,00 |
| 0 | 0 | 1      |        | 1      |        | 1      |        | 4,00 | 0,00 | 1    | 5    | 4,00 | 1      | 2      | 47,00 | 0,00 |
| 1 | 0 | 1      |        | 1      |        | 1      |        | 4,00 | 1,00 | 2    | 1    | 2,00 | 1      | 4      | 53,00 | 0,00 |
| 0 | 0 | 1      |        | 1      |        | 1      |        | 4,00 | 1,00 | 1    | 2    | 5,00 | 5      | 1      | 52,00 | 0,00 |
| 0 | 0 | 1      |        | 1      |        | 1      |        | 4,00 | 1,00 | 4    | 3    | 2,00 | 1      | 4      | 51,00 | 0,00 |
| 0 | 0 | 1      |        | 1      |        | 1      |        | 4,00 | 1,00 | 1    | 4    | 5,00 | 5      | 1      | 50,00 | 0,00 |
| 0 | 0 | 1      |        | 1      |        | 1      |        | 4,00 | 0,00 | 2    | 5    | 4,00 | 5      | 2      | 49,00 | 0,00 |
| 0 | 0 | 1      |        | 1      |        | 1      |        | 4,00 | 0,00 | 4    | 5    | 4,00 | 3      | 2      | 69,00 | 0,00 |
| 0 | 0 | 1      |        | 1      |        | 1      |        | 4,00 | 0,00 | 4    | 5    | 5,00 | 2      | 1      | 64,00 | 0,00 |

|   |   |        |        |        |        |      |      |   |   |      |   |   |        |      |
|---|---|--------|--------|--------|--------|------|------|---|---|------|---|---|--------|------|
| 1 | 0 | 1      | 1      | 1      | 1      | 4,00 | 1,00 | 2 | 1 | 1,00 | 3 | 5 | 57,00  | 0,00 |
| 1 | 1 | 1      | 1      | 1      | 1      | 4,00 | 1,00 | 1 | 5 | 1,00 | 5 | 5 | 68,00  | 0,00 |
| 0 | 1 | 1      | 1      | 1      | 1      | 4,00 | 0,00 | 4 | 3 | 5,00 | 3 | 1 | 59,00  | 0,00 |
| 0 | 0 | 1      | 1      | 1      | 1      | 4,00 | 1,00 | 4 | 1 | 2,00 | 4 | 4 | 61,00  | 0,00 |
| 1 | 0 | 1      | 1      | 1      | 1      | 4,00 | 0,00 | 4 | 4 | 4,00 | 4 | 2 | 58,00  | 0,00 |
| 0 | 0 | 1      | 1      | 1      | 1      | 4,00 | 0,00 | 3 | 4 | 2,00 | 4 | 4 | 70,00  | 0,00 |
| 0 | 0 | 1      | 1      | 1      | 1      | 4,00 | 0,00 | 2 | 5 | 5,00 | 5 | 1 | 56,00  | 0,00 |
| 0 | 0 | 1      | 1      | 1      | 1      | 4,00 | 0,00 | 5 | 2 | 3,00 | 5 | 3 | 65,00  | 0,00 |
| 0 | 1 | 1      | 1      | 1      | 1      | 4,00 | 1,00 | 1 | 4 | 5,00 | 3 | 1 | 53,00  | 0,00 |
| 0 | 0 | 1      | 1      | 1      | 1      | 4,00 | 1,00 | 5 | 1 | 1,00 | 1 | 5 | 49,00  | 0,00 |
| 0 | 0 | 1      | 1      | 1      | 1      | 4,00 | 0,00 | 1 | 3 | 3,00 | 3 | 3 | 53,00  | 0,00 |
| 1 | 0 | 1      | 1      | 1      | 1      | 4,00 | 0,00 | 1 | 5 | 5,00 | 4 | 1 | 51,00  | 0,00 |
| 0 | 0 | 1      | 1      | 1      | 1      | 4,00 | 0,00 | 1 | 5 | 5,00 | 5 | 1 | #NULL! | 1,00 |
| 0 | 0 | 1      | 1      | #NULL! | 1      | 3,00 | 0,00 | 1 | 4 | 2,00 | 4 | 4 | 52,00  | 0,00 |
| 0 | 0 | 1      | 1      | #NULL! | #NULL! | 2,00 | 1,00 | 3 | 2 | 5,00 | 2 | 1 | 38,00  | 0,00 |
| 0 | 0 | #NULL! | 1      | #NULL! | #NULL! | 1,00 | 1,00 | 4 | 3 | 2,00 | 4 | 4 | 60,00  | 0,00 |
| 1 | 0 | #NULL! | 1      | #NULL! | #NULL! | 1,00 | 0,00 | 1 | 3 | 2,00 | 5 | 4 | 58,00  | 0,00 |
| 0 | 0 | #NULL! | 1      | #NULL! | #NULL! | 1,00 | 1,00 | 5 | 2 | 4,00 | 5 | 2 | 49,00  | 0,00 |
| 0 | 0 | #NULL! | 1      | #NULL! | #NULL! | 1,00 | 1,00 | 5 | 5 | 1,00 | 3 | 5 | 63,00  | 0,00 |
| 0 | 0 | 1      | 1      | #NULL! | #NULL! | 2,00 | 0,00 | 1 | 5 | 2,00 | 1 | 4 | 43,00  | 0,00 |
| 0 | 0 | 1      | #NULL! | #NULL! | #NULL! | 1,00 | 0,00 | 2 | 4 | 3,00 | 4 | 3 | 50,00  | 0,00 |
| 1 | 0 | #NULL! | 1      | #NULL! | #NULL! | 1,00 | 0,00 | 4 | 4 | 3,00 | 4 | 3 | 54,00  | 0,00 |
| 1 | 0 | #NULL! | 1      | #NULL! | #NULL! | 1,00 | 0,00 | 2 | 5 | 4,00 | 4 | 2 | 55,00  | 0,00 |
| 0 | 0 | 1      | 1      | #NULL! | #NULL! | 2,00 | 0,00 | 5 | 2 | 4,00 | 5 | 2 | 49,00  | 0,00 |
| 0 | 0 | 1      | 1      | #NULL! | 1      | 3,00 | 0,00 | 1 | 5 | 1,00 | 5 | 5 | 50,00  | 0,00 |
| 1 | 0 | 1      | #NULL! | 1      | 1      | 3,00 | 0,00 | 5 | 5 | 4,00 | 5 | 2 | 67,00  | 0,00 |
| 1 | 1 | 1      | 1      | #NULL! | 1      | 3,00 | 0,00 | 4 | 5 | 5,00 | 5 | 1 | 77,00  | 0,00 |
| 1 | 0 | 1      | #NULL! | #NULL! | #NULL! | 1,00 | 0,00 | 1 | 5 | 5,00 | 4 | 1 | 54,00  | 0,00 |
| 0 | 0 | 1      | 1      | #NULL! | #NULL! | 2,00 | 0,00 | 1 | 5 | 4,00 | 1 | 2 | 44,00  | 0,00 |
| 0 | 0 | #NULL! | 1      | 1      | #NULL! | 2,00 | 0,00 | 4 | 4 | 2,00 | 5 | 4 | 55,00  | 0,00 |
| 0 | 1 | #NULL! | #NULL! | 1      | #NULL! | 1,00 | 1,00 | 2 | 2 | 5,00 | 2 | 1 | 46,00  | 0,00 |
| 1 | 0 | 1      | 1      | #NULL! | #NULL! | 2,00 | 0,00 | 5 | 3 | 5,00 | 5 | 1 | 56,00  | 0,00 |
| 1 | 0 | #NULL! | 1      | 1      | 1      | 3,00 | 0,00 | 5 | 5 | 5,00 | 5 | 1 | 68,00  | 0,00 |

|   |   |        |        |        |        |      |      |   |   |      |   |   |        |        |
|---|---|--------|--------|--------|--------|------|------|---|---|------|---|---|--------|--------|
| 1 | 0 | #NULL! | 1      | #NULL! | #NULL! | 1,00 | 0,00 | 1 | 4 | 2,00 | 4 | 4 | 66,00  | 0,00   |
| 0 | 0 | 1      | #NULL! | #NULL! | #NULL! | 1,00 | 0,00 | 2 | 2 | 3,00 | 4 | 3 | 48,00  | 0,00   |
| 0 | 1 | #NULL! | #NULL! | 1      | #NULL! | 1,00 | 1,00 | 1 | 1 | 4,00 | 4 | 2 | 46,00  | 0,00   |
| 0 | 0 | 1      | 1      | #NULL! | #NULL! | 2,00 | 0,00 | 1 | 1 | 2,00 | 5 | 4 | 40,00  | 0,00   |
| 1 | 0 | 1      | #NULL! | #NULL! | #NULL! | 1,00 | 0,00 | 1 | 2 | 1,00 | 3 | 5 | 49,00  | 0,00   |
| 0 | 0 | #NULL! | 1      | #NULL! | #NULL! | 1,00 | 0,00 | 1 | 5 | 4,00 | 5 | 2 | 53,00  | 0,00   |
| 1 | 0 | #NULL! | 1      | #NULL! | #NULL! | 1,00 | 0,00 | 4 | 3 | 2,00 | 3 | 4 | 70,00  | 0,00   |
| 1 | 0 | #NULL! | 1      | 1      | #NULL! | 2,00 | 0,00 | 1 | 4 | 5,00 | 1 | 1 | 50,00  | 0,00   |
| 0 | 0 | #NULL! | 1      | #NULL! | #NULL! | 1,00 | 0,00 | 2 | 4 | 5,00 | 4 | 1 | 62,00  | 0,00   |
| 0 | 0 | #NULL! | 1      | #NULL! | #NULL! | 1,00 | 1,00 | 4 | 5 | 5,00 | 5 | 1 | 54,00  | 0,00   |
| 0 | 0 | #NULL! | 1      | 1      | #NULL! | 2,00 | 0,00 | 1 | 4 | 4,00 | 5 | 2 | 46,00  | 0,00   |
| 0 | 0 | #NULL! | 1      | #NULL! | #NULL! | 1,00 | 1,00 | 1 | 3 | 5,00 | 1 | 1 | 54,00  | 0,00   |
| 0 | 0 | #NULL! | 1      | 1      | 1      | 3,00 | 0,00 | 4 | 4 | 2,00 | 5 | 4 | 62,00  | 0,00   |
| 0 | 0 | #NULL! | 1      | #NULL! | #NULL! | 1,00 | 0,00 | 1 | 1 | 5,00 | 3 | 1 | 38,00  | 0,00   |
| 1 | 0 | 1      | 1      | #NULL! | #NULL! | 2,00 | 0,00 | 1 | 2 | 4,00 | 5 | 2 | 61,00  | 0,00   |
| 0 | 0 | #NULL! | 1      | #NULL! | #NULL! | 1,00 | 0,00 | 1 | 5 | 2,00 | 5 | 4 | 65,00  | 0,00   |
| 0 | 0 | #NULL! | 1      | #NULL! | #NULL! | 1,00 | 1,00 | 2 | 3 | 1,00 | 5 | 5 | 67,00  | 0,00   |
| 0 | 0 | #NULL! | 1      | #NULL! | #NULL! | 1,00 | 0,00 | 1 | 1 | 5,00 | 5 | 1 | 58,00  | 0,00   |
| 1 | 0 | 1      | #NULL! | #NULL! | #NULL! | 1,00 | 0,00 | 5 | 4 | 2,00 | 4 | 4 | 69,00  | 0,00   |
| 0 | 0 | #NULL! | 1      | 1      | 1      | 3,00 | 0,00 | 5 | 5 | 2,00 | 3 | 4 | 73,00  | 0,00   |
| 0 | 0 | #NULL! | 1      | #NULL! | #NULL! | 1,00 | 0,00 | 4 | 4 | 1,00 | 5 | 5 | 57,00  | 0,00   |
| 0 | 0 | #NULL! | 1      | #NULL! | #NULL! | 1,00 | 0,00 | 1 | 4 | 5,00 | 1 | 1 | 44,00  | 0,00   |
| 0 | 0 | #NULL! | 1      | #NULL! | #NULL! | 1,00 | 1,00 | 4 | 4 | 2,00 | 4 | 4 | 54,00  | 0,00   |
| 0 | 0 | #NULL! | 1      | 1      | #NULL! | 2,00 | 0,00 | 4 | 2 | 4,00 | 2 | 2 | 54,00  | 0,00   |
| 0 | 0 | #NULL! | 1      | #NULL! | #NULL! | 1,00 | 0,00 | 2 | 4 | 4,00 | 4 | 2 | 50,00  | 0,00   |
| 1 | 1 | #NULL! | 1      | #NULL! | 1      | 2,00 | 1,00 | 4 | 4 | 5,00 | 5 | 1 | 68,00  | 0,00   |
| 0 | 0 | #NULL! | #NULL! | 1      | #NULL! | 1,00 | 0,00 | 5 | 5 | 5,00 | 5 | 1 | #NULL! | 1,00   |
| 1 | 0 | #NULL! | #NULL! | 1      | #NULL! | 1,00 | 0,00 | 3 | 4 | 5,00 | 4 | 1 | #NULL! | 1,00   |
| 1 | 0 | 1      | #NULL! | #NULL! | #NULL! | 1,00 | 1,00 | 4 | 4 | 5,00 | 4 | 1 | #NULL! | 1,00   |
| 1 | 0 | 1      | 1      | 1      | 1      | 4,00 | 0,00 | 5 | 5 | 2,00 | 1 | 4 | 57,00  | #NULL! |
| 1 | 0 | 1      | 1      | 1      | 1      | 4,00 | 0,00 | 3 | 3 | 2,00 | 4 | 4 | 58,00  | 0,00   |
| 1 | 1 | 1      | 1      | 1      | 1      | 4,00 | 1,00 | 1 | 3 | 1,00 | 3 | 5 | 69,00  | 0,00   |
| 0 | 0 | 1      | 1      | 1      | 1      | 4,00 | 0,00 | 1 | 3 | 2,00 | 5 | 4 | 56,00  | 0,00   |

|   |   |   |   |   |   |      |      |   |   |      |   |   |        |      |
|---|---|---|---|---|---|------|------|---|---|------|---|---|--------|------|
| 1 | 0 | 1 | 1 | 1 | 1 | 4,00 | 0,00 | 5 | 4 | 2,00 | 5 | 4 | 67,00  | 0,00 |
| 1 | 0 | 1 | 1 | 1 | 1 | 4,00 | 0,00 | 2 | 5 | 3,00 | 4 | 3 | 55,00  | 0,00 |
| 0 | 0 | 1 | 1 | 1 | 1 | 4,00 | 0,00 | 4 | 2 | 4,00 | 3 | 2 | 70,00  | 0,00 |
| 0 | 0 | 1 | 1 | 1 | 1 | 4,00 | 0,00 | 4 | 5 | 5,00 | 1 | 1 | 63,00  | 0,00 |
| 1 | 0 | 1 | 1 | 1 | 1 | 4,00 | 0,00 | 1 | 5 | 2,00 | 1 | 4 | 60,00  | 0,00 |
| 0 | 0 | 1 | 1 | 1 | 1 | 4,00 | 0,00 | 4 | 3 | 3,00 | 4 | 3 | 66,00  | 0,00 |
| 1 | 1 | 1 | 1 | 1 | 1 | 4,00 | 0,00 | 4 | 4 | 3,00 | 4 | 3 | 61,00  | 0,00 |
| 1 | 0 | 1 | 1 | 1 | 1 | 4,00 | 0,00 | 4 | 5 | 5,00 | 4 | 1 | 65,00  | 0,00 |
| 0 | 0 | 1 | 1 | 1 | 1 | 4,00 | 0,00 | 5 | 5 | 2,00 | 4 | 4 | #NULL! | 1,00 |

| VacHes | VacAtt | ab   | effic1 | effic2 | effic3 | religi | cult | safety1 | safety2 | safety3 | sief_ef | perheal3 |
|--------|--------|------|--------|--------|--------|--------|------|---------|---------|---------|---------|----------|
| 1      | 2      | 0,00 | 3      | 3,00   | 3      | 1      | 1    | 5       | 5       | 2       | 3,60    | 2,00     |
| 1      | 1      | 0,00 | 5      | 5,00   | 1      | 1      | 5    | 1       | 5       | 1       | 2,60    | 3,00     |
| 3      | 1      | 0,00 | 3      | 5,00   | 1      | 1      | 1    | 2       | 3       | 1       | 2,00    | 3,00     |
| 2      | 3      | 0,00 | 3      | 2,00   | 4      | 3      | 3    | 5       | 5       | 5       | 4,40    | 3,00     |
| 2      | 1      | 0,00 | 2      | 3,00   | 3      | 3      | 3    | 2       | 3       | 3       | 2,60    | 3,00     |
| 5      | 1      | 0,00 | 2      | 4,00   | 2      | 1      | 1    | 2       | 2       | 5       | 2,60    | 1,00     |
| 5      | 1      | 0,00 | 2      | 4,00   | 2      | 1      | 1    | 2       | 2       | 5       | 2,60    | 1,00     |
| 2      | 1      | 0,00 | 3      | 2,00   | 2      | 1      | 1    | 5       | 4       | 5       | 3,80    | 3,00     |
| 3      | 2      | 0,00 | 1      | 3,00   | 2      | 2      | 2    | 2       | 3       | 2       | 2,00    | 3,00     |
| 1      | 1      | 0,00 | 1      | 2,00   | 1      | 4      | 1    | 4       | 1       | 5       | 2,40    | 3,00     |
| 1      | 2      | 0,00 | 4      | 1,00   | 3      | 5      | 4    | 4       | 4       | 5       | 4,00    | 3,00     |
| 3      | 1      | 0,00 | 3      | 1,00   | 1      | 1      | 1    | 3       | 1       | 3       | 2,20    | 3,00     |
| 5      | 1      | 0,00 | 4      | 1,00   | 1      | 1      | 4    | 1       | 4       | 5       | 3,00    | 3,00     |
| 1      | 4      | 0,00 | 3      | 3,00   | 3      | 1      | 3    | 4       | 2       | 3       | 3,00    | 3,00     |
| 4      | 3      | 0,00 | 3      | 3,00   | 3      | 4      | 1    | 1       | 3       | 2       | 2,40    | 3,00     |
| 4      | 4      | 0,00 | 4      | 3,00   | 3      | 2      | 3    | 3       | 3       | 3       | 3,20    | 2,00     |
| 4      | 2      | 0,00 | 2      | 1,00   | 1      | 1      | 1    | 4       | 5       | 5       | 3,40    | 3,00     |
| 4      | 1      | 0,00 | 4      | 3,00   | 5      | 2      | 4    | 4       | 4       | 2       | 3,80    | 3,00     |
| 2      | 3      | 0,00 | 4      | 4,00   | 5      | 2      | 3    | 4       | 4       | 5       | 4,40    | 3,00     |
| 1      | 1      | 0,00 | 2      | 5,00   | 1      | 1      | 1    | 5       | 4       | 3       | 3,00    | 3,00     |
| 5      | 4      | 0,00 | 1      | 3,00   | 2      | 1      | 5    | 2       | 4       | 4       | 2,60    | 2,00     |
| 4      | 3      | 0,00 | 4      | 1,00   | 5      | 3      | 4    | 4       | 4       | 5       | 4,40    | 2,00     |
| 2      | 1      | 0,00 | 1      | 4,00   | 1      | 1      | 2    | 4       | 4       | 5       | 3,00    | 1,00     |
| 4      | 1      | 0,00 | 1      | 1,00   | 1      | 1      | 1    | 3       | 3       | 2       | 2,00    | 2,00     |
| 2      | 1      | 0,00 | 1      | 1,00   | 4      | 1      | 1    | 3       | 3       | 2       | 2,60    | 2,00     |
| 4      | 1      | 0,00 | 1      | 1,00   | 1      | 1      | 1    | 2       | 4       | 5       | 2,60    | 3,00     |
| 5      | 1      | 0,00 | 3      | 4,00   | 1      | 1      | 3    | 4       | 2       | 2       | 2,40    | 3,00     |
| 5      | 2      | 0,00 | 1      | 4,00   | 1      | 4      | 2    | 2       | 1       | 2       | 1,40    | 2,00     |
| 5      | 4      | 0,00 | 2      | 2,00   | 1      | 1      | 1    | 4       | 4       | 4       | 3,00    | 2,00     |
| 2      | 4      | 0,00 | 4      | 2,00   | 3      | 3      | 2    | 3       | 4       | 4       | 3,60    | 3,00     |
| 4      | 1      | 0,00 | 2      | 2,00   | 2      | 1      | 2    | 4       | 3       | 3       | 2,80    | 3,00     |
| 1      | 1      | 0,00 | 5      | 5,00   | 1      | 5      | 1    | 5       | 5       | 5       | 4,20    | 3,00     |

|   |   |      |   |      |   |   |   |   |   |   |      |      |
|---|---|------|---|------|---|---|---|---|---|---|------|------|
| 3 | 1 | 0,00 | 3 | 2,00 | 1 | 1 | 1 | 4 | 3 | 5 | 3,20 | 2,00 |
| 2 | 2 | 0,00 | 3 | 5,00 | 2 | 2 | 2 | 4 | 1 | 1 | 2,20 | 2,00 |
| 5 | 1 | 0,00 | 1 | 1,00 | 1 | 1 | 1 | 5 | 1 | 4 | 2,40 | 3,00 |
| 5 | 1 | 0,00 | 1 | 2,00 | 4 | 4 | 1 | 4 | 1 | 4 | 2,80 | 3,00 |
| 2 | 1 | 0,00 | 4 | 2,00 | 1 | 1 | 2 | 5 | 2 | 1 | 2,60 | 3,00 |
| 3 | 1 | 0,00 | 1 | 1,00 | 1 | 1 | 1 | 2 | 1 | 4 | 1,80 | 3,00 |
| 1 | 1 | 0,00 | 3 | 3,00 | 5 | 5 | 5 | 5 | 3 | 5 | 4,20 | 2,00 |
| 2 | 1 | 0,00 | 3 | 2,00 | 4 | 4 | 3 | 4 | 4 | 4 | 3,80 | 2,00 |
| 5 | 1 | 0,00 | 3 | 1,00 | 4 | 3 | 3 | 4 | 3 | 4 | 3,60 | 2,00 |
| 1 | 2 | 0,00 | 3 | 5,00 | 1 | 1 | 3 | 3 | 5 | 4 | 3,20 | 2,00 |
| 1 | 1 | 0,00 | 4 | 1,00 | 4 | 4 | 5 | 2 | 4 | 4 | 3,60 | 3,00 |
| 1 | 5 | 0,00 | 5 | 1,00 | 4 | 4 | 5 | 3 | 4 | 4 | 4,00 | 1,00 |
| 1 | 1 | 0,00 | 2 | 1,00 | 1 | 4 | 2 | 5 | 1 | 4 | 2,60 | 3,00 |
| 5 | 1 | 0,00 | 3 | 2,00 | 4 | 2 | 2 | 2 | 2 | 4 | 3,00 | 3,00 |
| 4 | 1 | 0,00 | 3 | 2,00 | 3 | 1 | 1 | 4 | 4 | 4 | 3,60 | 2,00 |
| 1 | 1 | 0,00 | 5 | 2,00 | 4 | 5 | 3 | 5 | 5 | 5 | 4,80 | 2,00 |
| 1 | 1 | 0,00 | 4 | 2,00 | 2 | 5 | 2 | 5 | 4 | 5 | 4,00 | 3,00 |
| 1 | 1 | 0,00 | 4 | 4,00 | 3 | 5 | 1 | 5 | 5 | 5 | 4,40 | 3,00 |
| 4 | 2 | 0,00 | 4 | 2,00 | 2 | 1 | 1 | 5 | 5 | 5 | 4,20 | 3,00 |
| 4 | 2 | 0,00 | 3 | 2,00 | 1 | 4 | 2 | 4 | 4 | 4 | 3,20 | 3,00 |
| 4 | 2 | 0,00 | 4 | 2,00 | 1 | 4 | 2 | 3 | 4 | 4 | 3,20 | 3,00 |
| 5 | 2 | 0,00 | 2 | 2,00 | 4 | 4 | 4 | 4 | 4 | 4 | 3,60 | 3,00 |
| 4 | 3 | 0,00 | 2 | 2,00 | 2 | 4 | 4 | 4 | 4 | 4 | 3,20 | 3,00 |
| 2 | 1 | 0,00 | 4 | 2,00 | 2 | 1 | 1 | 5 | 5 | 5 | 4,20 | 3,00 |
| 4 | 1 | 0,00 | 1 | 4,00 | 1 | 1 | 1 | 4 | 4 | 5 | 3,00 | 2,00 |
| 3 | 3 | 0,00 | 3 | 4,00 | 4 | 2 | 4 | 4 | 3 | 4 | 3,60 | 3,00 |
| 5 | 1 | 0,00 | 3 | 1,00 | 1 | 1 | 1 | 5 | 5 | 4 | 3,60 | 3,00 |
| 4 | 1 | 0,00 | 1 | 1,00 | 1 | 1 | 1 | 4 | 1 | 4 | 2,20 | 3,00 |
| 3 | 1 | 0,00 | 2 | 3,00 | 3 | 1 | 1 | 3 | 3 | 3 | 2,80 | 3,00 |
| 3 | 5 | 0,00 | 4 | 1,00 | 4 | 1 | 1 | 3 | 1 | 4 | 3,20 | 1,00 |
| 3 | 2 | 0,00 | 3 | 2,00 | 3 | 3 | 3 | 3 | 2 | 3 | 2,80 | 1,00 |
| 3 | 3 | 0,00 | 4 | 3,00 | 3 | 4 | 1 | 4 | 3 | 4 | 3,60 | 3,00 |
| 5 | 1 | 0,00 | 1 | 1,00 | 1 | 1 | 1 | 4 | 1 | 2 | 1,80 | 3,00 |

|   |   |      |   |      |   |   |   |   |   |   |      |      |
|---|---|------|---|------|---|---|---|---|---|---|------|------|
| 1 | 1 | 0,00 | 3 | 3,00 | 4 | 5 | 2 | 3 | 3 | 4 | 3,40 | 3,00 |
| 5 | 1 | 0,00 | 1 | 1,00 | 1 | 1 | 1 | 2 | 2 | 4 | 2,00 | 2,00 |
| 4 | 4 | 0,00 | 3 | 2,00 | 4 | 3 | 4 | 4 | 4 | 3 | 3,60 | 2,00 |
| 5 | 4 | 0,00 | 3 | 5,00 | 5 | 1 | 1 | 1 | 1 | 4 | 2,80 | 3,00 |
| 1 | 2 | 0,00 | 2 | 2,00 | 1 | 1 | 1 | 5 | 3 | 4 | 3,00 | 3,00 |
| 3 | 1 | 0,00 | 3 | 3,00 | 3 | 3 | 3 | 4 | 3 | 5 | 3,60 | 2,00 |
| 1 | 1 | 0,00 | 3 | 1,00 | 5 | 5 | 3 | 5 | 5 | 5 | 4,60 | 1,00 |
| 5 | 1 | 0,00 | 1 | 1,00 | 1 | 1 | 1 | 5 | 3 | 4 | 2,80 | 2,00 |
| 1 | 1 | 0,00 | 2 | 1,00 | 1 | 1 | 1 | 3 | 3 | 1 | 2,00 | 3,00 |
| 4 | 1 | 0,00 | 3 | 2,00 | 4 | 2 | 2 | 4 | 4 | 4 | 3,80 | 2,00 |
| 5 | 1 | 0,00 | 3 | 3,00 | 1 | 3 | 3 | 4 | 4 | 5 | 3,40 | 2,00 |
| 4 | 1 | 0,00 | 2 | 2,00 | 1 | 1 | 1 | 2 | 5 | 5 | 3,00 | 3,00 |
| 3 | 2 | 0,00 | 3 | 4,00 | 3 | 4 | 5 | 5 | 4 | 5 | 4,00 | 2,00 |
| 5 | 5 | 0,00 | 4 | 4,00 | 3 | 5 | 4 | 3 | 5 | 4 | 3,80 | 1,00 |
| 4 | 1 | 0,00 | 4 | 3,00 | 4 | 4 | 1 | 3 | 4 | 4 | 3,80 | 3,00 |
| 2 | 4 | 0,00 | 4 | 3,00 | 3 | 5 | 3 | 5 | 5 | 5 | 4,40 | 1,00 |
| 5 | 4 | 0,00 | 4 | 1,00 | 1 | 3 | 1 | 5 | 5 | 5 | 4,00 | 3,00 |
| 5 | 4 | 0,00 | 1 | 1,00 | 1 | 1 | 1 | 5 | 1 | 5 | 2,60 | 3,00 |
| 5 | 2 | 0,00 | 5 | 1,00 | 4 | 3 | 2 | 3 | 5 | 2 | 3,80 | 3,00 |
| 5 | 4 | 0,00 | 1 | 1,00 | 1 | 1 | 1 | 5 | 1 | 5 | 2,60 | 2,00 |
| 5 | 1 | 0,00 | 5 | 1,00 | 1 | 3 | 1 | 4 | 3 | 5 | 3,60 | 3,00 |
| 2 | 3 | 0,00 | 3 | 2,00 | 3 | 5 | 1 | 4 | 4 | 4 | 3,60 | 1,00 |
| 5 | 3 | 0,00 | 3 | 2,00 | 4 | 3 | 4 | 4 | 5 | 4 | 4,00 | 2,00 |
| 2 | 5 | 0,00 | 4 | 2,00 | 3 | 3 | 4 | 4 | 3 | 4 | 3,60 | 1,00 |
| 4 | 3 | 0,00 | 4 | 2,00 | 3 | 4 | 5 | 4 | 3 | 4 | 3,60 | 1,00 |
| 3 | 4 | 0,00 | 2 | 2,00 | 4 | 4 | 4 | 4 | 4 | 4 | 3,60 | 2,00 |
| 2 | 1 | 0,00 | 2 | 4,00 | 3 | 1 | 2 | 5 | 3 | 2 | 3,00 | 3,00 |
| 1 | 4 | 0,00 | 3 | 3,00 | 3 | 4 | 3 | 3 | 3 | 4 | 3,20 | 3,00 |
| 3 | 1 | 0,00 | 2 | 2,00 | 3 | 2 | 4 | 2 | 4 | 4 | 3,00 | 1,00 |
| 2 | 5 | 0,00 | 5 | 1,00 | 5 | 5 | 5 | 5 | 5 | 5 | 5,00 | 3,00 |
| 1 | 1 | 0,00 | 1 | 1,00 | 5 | 1 | 5 | 5 | 3 | 5 | 3,80 | 2,00 |
| 5 | 5 | 0,00 | 1 | 1,00 | 4 | 5 | 4 | 4 | 3 | 4 | 3,20 | 3,00 |
| 5 | 3 | 0,00 | 3 | 2,00 | 1 | 1 | 4 | 4 | 2 | 1 | 2,20 | 3,00 |

|   |   |      |   |      |   |   |   |   |   |   |      |      |
|---|---|------|---|------|---|---|---|---|---|---|------|------|
| 3 | 3 | 0,00 | 3 | 1,00 | 2 | 4 | 1 | 2 | 3 | 3 | 2,60 | 3,00 |
| 1 | 1 | 0,00 | 4 | 1,00 | 5 | 5 | 1 | 5 | 5 | 5 | 4,80 | 1,00 |
| 1 | 3 | 0,00 | 5 | 1,00 | 4 | 4 | 2 | 5 | 2 | 4 | 4,00 | 2,00 |
| 1 | 4 | 0,00 | 3 | 3,00 | 4 | 3 | 3 | 3 | 3 | 3 | 3,20 | 1,00 |
| 2 | 4 | 0,00 | 3 | 2,00 | 4 | 1 | 4 | 4 | 4 | 4 | 3,80 | 1,00 |
| 5 | 1 | 0,00 | 3 | 1,00 | 2 | 1 | 1 | 4 | 4 | 4 | 3,40 | 3,00 |
| 1 | 1 | 0,00 | 5 | 4,00 | 5 | 5 | 1 | 5 | 5 | 5 | 5,00 | 1,00 |
| 5 | 2 | 0,00 | 3 | 4,00 | 3 | 3 | 1 | 4 | 5 | 3 | 3,60 | 2,00 |
| 3 | 2 | 0,00 | 3 | 3,00 | 3 | 3 | 3 | 3 | 5 | 3 | 3,40 | 3,00 |
| 1 | 1 | 0,00 | 4 | 4,00 | 1 | 2 | 1 | 4 | 4 | 1 | 2,80 | 3,00 |
| 4 | 5 | 0,00 | 3 | 3,00 | 1 | 5 | 5 | 3 | 3 | 1 | 2,20 | 3,00 |
| 2 | 1 | 0,00 | 1 | 1,00 | 1 | 4 | 1 | 5 | 1 | 5 | 2,60 | 2,00 |
| 2 | 3 | 0,00 | 4 | 2,00 | 4 | 4 | 4 | 5 | 3 | 4 | 4,00 | 1,00 |
| 5 | 2 | 0,00 | 4 | 1,00 | 1 | 2 | 5 | 3 | 4 | 2 | 2,80 | 3,00 |
| 1 | 2 | 0,00 | 3 | 3,00 | 2 | 5 | 2 | 5 | 5 | 2 | 3,40 | 2,00 |
| 3 | 1 | 0,00 | 1 | 2,00 | 1 | 1 | 1 | 4 | 3 | 5 | 2,80 | 1,00 |
| 4 | 1 | 0,00 | 4 | 2,00 | 4 | 4 | 1 | 4 | 4 | 5 | 4,20 | 3,00 |
| 3 | 2 | 0,00 | 3 | 2,00 | 4 | 2 | 3 | 3 | 3 | 2 | 3,00 | 3,00 |
| 5 | 1 | 0,00 | 1 | 1,00 | 1 | 5 | 5 | 2 | 5 | 5 | 2,80 | 2,00 |
| 1 | 3 | 0,00 | 2 | 5,00 | 1 | 4 | 3 | 1 | 1 | 1 | 1,20 | 2,00 |
| 1 | 1 | 0,00 | 4 | 1,00 | 4 | 1 | 4 | 4 | 3 | 4 | 3,80 | 2,00 |
| 1 | 1 | 0,00 | 3 | 3,00 | 4 | 2 | 4 | 5 | 5 | 5 | 4,40 | 3,00 |
| 1 | 2 | 0,00 | 2 | 5,00 | 1 | 2 | 2 | 1 | 2 | 1 | 1,40 | 2,00 |
| 5 | 1 | 0,00 | 1 | 4,00 | 5 | 1 | 1 | 3 | 1 | 1 | 2,20 | 3,00 |
| 1 | 3 | 0,00 | 4 | 1,00 | 4 | 4 | 3 | 1 | 3 | 4 | 3,20 | 3,00 |
| 3 | 1 | 0,00 | 1 | 2,00 | 4 | 2 | 1 | 2 | 4 | 3 | 2,80 | 1,00 |
| 1 | 5 | 0,00 | 4 | 3,00 | 4 | 3 | 5 | 4 | 4 | 1 | 3,40 | 1,00 |
| 5 | 1 | 0,00 | 1 | 1,00 | 1 | 1 | 1 | 4 | 1 | 1 | 1,60 | 3,00 |
| 2 | 4 | 0,00 | 1 | 2,00 | 3 | 3 | 2 | 3 | 4 | 4 | 3,00 | 1,00 |
| 5 | 1 | 0,00 | 3 | 1,00 | 1 | 1 | 1 | 3 | 3 | 3 | 2,60 | 3,00 |
| 5 | 1 | 0,00 | 1 | 1,00 | 1 | 1 | 1 | 4 | 1 | 1 | 1,60 | 3,00 |
| 1 | 1 | 0,00 | 5 | 5,00 | 1 | 1 | 1 | 3 | 1 | 1 | 2,20 | 3,00 |
| 1 | 1 | 0,00 | 5 | 1,00 | 1 | 5 | 1 | 2 | 4 | 5 | 3,40 | 3,00 |

|   |   |      |   |      |   |   |   |   |   |   |      |      |
|---|---|------|---|------|---|---|---|---|---|---|------|------|
| 1 | 1 | 0,00 | 4 | 5,00 | 1 | 5 | 1 | 5 | 5 | 5 | 4,00 | 3,00 |
| 5 | 3 | 0,00 | 4 | 2,00 | 3 | 3 | 3 | 3 | 1 | 4 | 3,00 | 3,00 |
| 1 | 2 | 0,00 | 3 | 5,00 | 3 | 3 | 3 | 3 | 3 | 4 | 3,20 | 2,00 |
| 3 | 1 | 0,00 | 3 | 1,00 | 1 | 1 | 1 | 3 | 4 | 1 | 2,40 | 1,00 |
| 5 | 4 | 0,00 | 4 | 1,00 | 5 | 3 | 3 | 5 | 3 | 5 | 4,40 | 2,00 |
| 5 | 5 | 0,00 | 3 | 1,00 | 5 | 5 | 5 | 5 | 3 | 1 | 3,40 | 1,00 |
| 1 | 1 | 0,00 | 1 | 3,00 | 1 | 1 | 5 | 5 | 1 | 3 | 2,20 | 3,00 |
| 5 | 1 | 0,00 | 2 | 1,00 | 2 | 4 | 3 | 2 | 2 | 4 | 2,40 | 3,00 |
| 1 | 4 | 0,00 | 5 | 2,00 | 1 | 1 | 1 | 2 | 5 | 4 | 3,40 | 1,00 |
| 5 | 5 | 0,00 | 1 | 1,00 | 1 | 2 | 2 | 3 | 1 | 4 | 2,00 | 2,00 |
| 5 | 1 | 0,00 | 1 | 2,00 | 1 | 4 | 1 | 4 | 2 | 2 | 2,00 | 2,00 |
| 4 | 1 | 0,00 | 3 | 3,00 | 2 | 5 | 1 | 3 | 3 | 5 | 3,20 | 2,00 |
| 4 | 1 | 0,00 | 4 | 2,00 | 1 | 4 | 1 | 5 | 4 | 5 | 3,80 | 2,00 |
| 1 | 1 | 0,00 | 5 | 5,00 | 4 | 5 | 1 | 5 | 5 | 1 | 4,00 | 2,00 |
| 3 | 1 | 0,00 | 4 | 2,00 | 2 | 1 | 1 | 5 | 4 | 5 | 4,00 | 2,00 |
| 3 | 1 | 0,00 | 4 | 4,00 | 1 | 1 | 4 | 4 | 3 | 3 | 3,00 | 3,00 |
| 1 | 5 | 0,00 | 5 | 3,00 | 1 | 1 | 4 | 4 | 5 | 5 | 4,00 | 3,00 |
| 4 | 1 | 0,00 | 4 | 2,00 | 1 | 1 | 1 | 5 | 5 | 5 | 4,00 | 2,00 |
| 3 | 2 | 0,00 | 4 | 2,00 | 2 | 4 | 3 | 5 | 5 | 4 | 4,00 | 2,00 |
| 3 | 1 | 0,00 | 4 | 2,00 | 1 | 1 | 1 | 5 | 5 | 5 | 4,00 | 3,00 |
| 2 | 1 | 0,00 | 4 | 3,00 | 1 | 1 | 1 | 5 | 5 | 5 | 4,00 | 3,00 |
| 1 | 1 | 0,00 | 5 | 5,00 | 5 | 1 | 2 | 5 | 5 | 5 | 5,00 | 3,00 |
| 1 | 5 | 0,00 | 5 | 1,00 | 5 | 5 | 5 | 5 | 5 | 4 | 4,80 | 3,00 |
| 1 | 4 | 0,00 | 5 | 5,00 | 3 | 1 | 1 | 5 | 5 | 5 | 4,60 | 1,00 |
| 3 | 1 | 0,00 | 3 | 3,00 | 1 | 1 | 1 | 1 | 1 | 1 | 1,40 | 3,00 |
| 1 | 1 | 0,00 | 2 | 2,00 | 4 | 1 | 1 | 5 | 2 | 4 | 3,40 | 2,00 |
| 4 | 2 | 0,00 | 3 | 2,00 | 1 | 2 | 2 | 5 | 4 | 5 | 3,60 | 3,00 |
| 2 | 1 | 0,00 | 3 | 1,00 | 4 | 4 | 3 | 5 | 3 | 4 | 3,80 | 2,00 |
| 2 | 1 | 0,00 | 5 | 3,00 | 3 | 3 | 1 | 5 | 5 | 5 | 4,60 | 3,00 |
| 5 | 1 | 0,00 | 2 | 1,00 | 1 | 1 | 1 | 4 | 2 | 4 | 2,60 | 2,00 |
| 5 | 1 | 0,00 | 1 | 2,00 | 1 | 1 | 1 | 4 | 1 | 1 | 1,60 | 2,00 |
| 5 | 1 | 0,00 | 1 | 1,00 | 1 | 1 | 1 | 1 | 1 | 4 | 1,60 | 3,00 |
| 1 | 2 | 0,00 | 1 | 1,00 | 5 | 1 | 1 | 3 | 3 | 5 | 3,40 | 3,00 |

|   |   |      |   |      |   |   |   |   |   |   |      |      |
|---|---|------|---|------|---|---|---|---|---|---|------|------|
| 3 | 1 | 0,00 | 1 | 1,00 | 4 | 5 | 2 | 3 | 5 | 4 | 3,40 | 3,00 |
| 1 | 4 | 0,00 | 4 | 2,00 | 1 | 4 | 1 | 4 | 4 | 4 | 3,40 | 1,00 |
| 1 | 2 | 0,00 | 4 | 3,00 | 3 | 3 | 3 | 5 | 5 | 2 | 3,80 | 3,00 |
| 4 | 1 | 0,00 | 2 | 1,00 | 1 | 4 | 1 | 4 | 5 | 4 | 3,20 | 3,00 |
| 3 | 4 | 0,00 | 4 | 1,00 | 4 | 3 | 4 | 5 | 5 | 5 | 4,60 | 1,00 |
| 2 | 1 | 0,00 | 2 | 2,00 | 1 | 3 | 1 | 5 | 3 | 4 | 3,00 | 3,00 |
| 1 | 1 | 0,00 | 4 | 2,00 | 1 | 1 | 1 | 4 | 4 | 4 | 3,40 | 1,00 |
| 4 | 4 | 0,00 | 4 | 2,00 | 3 | 5 | 4 | 4 | 4 | 5 | 4,00 | 2,00 |
| 1 | 3 | 0,00 | 5 | 4,00 | 4 | 5 | 3 | 4 | 2 | 2 | 3,40 | 2,00 |
| 1 | 2 | 0,00 | 4 | 3,00 | 2 | 1 | 1 | 5 | 5 | 4 | 4,00 | 3,00 |
| 4 | 1 | 0,00 | 5 | 1,00 | 5 | 5 | 5 | 5 | 5 | 5 | 5,00 | 2,00 |
| 1 | 1 | 0,00 | 4 | 3,00 | 4 | 4 | 1 | 5 | 5 | 4 | 4,40 | 1,00 |
| 5 | 1 | 0,00 | 1 | 2,00 | 4 | 1 | 1 | 4 | 3 | 4 | 3,20 | 2,00 |
| 5 | 4 | 0,00 | 1 | 4,00 | 1 | 5 | 5 | 3 | 2 | 5 | 2,40 | 1,00 |
| 3 | 1 | 0,00 | 3 | 2,00 | 4 | 1 | 1 | 5 | 4 | 5 | 4,20 | 2,00 |
| 3 | 2 | 0,00 | 2 | 4,00 | 5 | 2 | 2 | 4 | 4 | 5 | 4,00 | 1,00 |
| 4 | 1 | 0,00 | 1 | 1,00 | 1 | 1 | 1 | 4 | 2 | 4 | 2,40 | 2,00 |
| 5 | 3 | 0,00 | 4 | 5,00 | 5 | 3 | 4 | 4 | 2 | 5 | 4,00 | 3,00 |
| 3 | 2 | 0,00 | 3 | 2,00 | 2 | 3 | 1 | 5 | 5 | 1 | 3,20 | 3,00 |
| 3 | 4 | 0,00 | 1 | 5,00 | 4 | 4 | 4 | 3 | 3 | 1 | 2,40 | 2,00 |
| 5 | 1 | 0,00 | 3 | 2,00 | 1 | 1 | 1 | 5 | 5 | 4 | 3,60 | 2,00 |
| 4 | 1 | 0,00 | 2 | 2,00 | 2 | 1 | 1 | 5 | 3 | 4 | 3,20 | 2,00 |
| 5 | 1 | 0,00 | 1 | 1,00 | 3 | 1 | 4 | 2 | 1 | 5 | 2,40 | 1,00 |
| 5 | 1 | 0,00 | 1 | 5,00 | 1 | 1 | 1 | 2 | 3 | 1 | 1,60 | 2,00 |
| 5 | 1 | 0,00 | 1 | 5,00 | 1 | 1 | 1 | 2 | 3 | 1 | 1,60 | 2,00 |
| 3 | 1 | 0,00 | 1 | 1,00 | 1 | 1 | 1 | 5 | 2 | 2 | 2,20 | 3,00 |
| 1 | 1 | 0,00 | 2 | 1,00 | 1 | 1 | 1 | 5 | 5 | 5 | 3,60 | 2,00 |
| 2 | 1 | 0,00 | 3 | 4,00 | 4 | 1 | 2 | 4 | 5 | 4 | 4,00 | 2,00 |
| 4 | 1 | 0,00 | 1 | 2,00 | 1 | 1 | 1 | 4 | 4 | 4 | 2,80 | 1,00 |
| 4 | 5 | 0,00 | 4 | 1,00 | 3 | 3 | 4 | 4 | 4 | 5 | 4,00 | 3,00 |
| 1 | 4 | 0,00 | 5 | 5,00 | 5 | 5 | 4 | 5 | 5 | 5 | 5,00 | 2,00 |
| 2 | 3 | 0,00 | 2 | 4,00 | 2 | 2 | 2 | 2 | 2 | 2 | 2,00 | 1,00 |
| 3 | 2 | 0,00 | 4 | 2,00 | 3 | 3 | 2 | 5 | 5 | 2 | 3,80 | 2,00 |

|   |   |      |   |      |   |   |   |   |   |   |      |      |
|---|---|------|---|------|---|---|---|---|---|---|------|------|
| 2 | 3 | 0,00 | 2 | 3,00 | 3 | 3 | 3 | 2 | 1 | 3 | 2,20 | 3,00 |
| 2 | 4 | 0,00 | 5 | 2,00 | 5 | 5 | 1 | 5 | 4 | 3 | 4,40 | 1,00 |
| 1 | 4 | 0,00 | 3 | 2,00 | 2 | 3 | 1 | 2 | 3 | 1 | 2,20 | 2,00 |
| 1 | 2 | 0,00 | 4 | 5,00 | 2 | 1 | 1 | 5 | 3 | 5 | 3,80 | 3,00 |
| 5 | 1 | 0,00 | 1 | 1,00 | 1 | 3 | 2 | 3 | 1 | 4 | 2,00 | 3,00 |
| 1 | 3 | 0,00 | 3 | 1,00 | 1 | 2 | 1 | 4 | 2 | 2 | 2,40 | 3,00 |
| 5 | 1 | 0,00 | 2 | 1,00 | 1 | 2 | 2 | 3 | 2 | 1 | 1,80 | 3,00 |
| 5 | 5 | 0,00 | 2 | 1,00 | 4 | 1 | 3 | 4 | 2 | 4 | 3,20 | 1,00 |
| 2 | 3 | 0,00 | 2 | 3,00 | 1 | 1 | 2 | 4 | 5 | 1 | 2,60 | 3,00 |
| 1 | 1 | 0,00 | 5 | 5,00 | 5 | 3 | 3 | 3 | 5 | 5 | 4,60 | 2,00 |
| 1 | 1 | 0,00 | 5 | 5,00 | 3 | 1 | 1 | 4 | 5 | 4 | 4,20 | 3,00 |
| 5 | 1 | 0,00 | 2 | 4,00 | 1 | 1 | 2 | 4 | 2 | 5 | 2,80 | 1,00 |
| 2 | 1 | 0,00 | 5 | 2,00 | 4 | 1 | 2 | 1 | 4 | 4 | 3,60 | 2,00 |
| 2 | 3 | 0,00 | 1 | 5,00 | 5 | 1 | 1 | 4 | 2 | 5 | 3,40 | 2,00 |
| 1 | 1 | 0,00 | 4 | 5,00 | 1 | 1 | 5 | 5 | 1 | 5 | 3,20 | 3,00 |
| 1 | 1 | 0,00 | 4 | 1,00 | 3 | 5 | 5 | 1 | 5 | 5 | 3,60 | 3,00 |
| 3 | 1 | 0,00 | 2 | 1,00 | 1 | 1 | 4 | 4 | 2 | 4 | 2,60 | 2,00 |
| 4 | 1 | 0,00 | 1 | 1,00 | 1 | 2 | 2 | 4 | 1 | 4 | 2,20 | 3,00 |
| 5 | 1 | 0,00 | 4 | 1,00 | 1 | 4 | 1 | 5 | 3 | 5 | 3,60 | 3,00 |
| 5 | 3 | 0,00 | 4 | 1,00 | 4 | 5 | 3 | 5 | 3 | 5 | 4,20 | 3,00 |
| 1 | 2 | 0,00 | 5 | 1,00 | 4 | 5 | 4 | 5 | 5 | 5 | 4,80 | 3,00 |
| 3 | 1 | 0,00 | 3 | 1,00 | 1 | 1 | 1 | 4 | 1 | 4 | 2,60 | 2,00 |
| 4 | 3 | 0,00 | 2 | 4,00 | 3 | 4 | 2 | 4 | 4 | 5 | 3,60 | 2,00 |
| 5 | 1 | 0,00 | 1 | 2,00 | 3 | 1 | 4 | 5 | 1 | 2 | 2,40 | 3,00 |
| 5 | 1 | 0,00 | 2 | 2,00 | 2 | 1 | 1 | 2 | 4 | 4 | 2,80 | 2,00 |
| 4 | 1 | 0,00 | 4 | 2,00 | 1 | 4 | 4 | 5 | 5 | 5 | 4,00 | 3,00 |
| 5 | 1 | 0,00 | 1 | 1,00 | 1 | 1 | 5 | 1 | 1 | 1 | 1,00 | 3,00 |
| 1 | 3 | 0,00 | 2 | 1,00 | 5 | 3 | 5 | 2 | 2 | 5 | 3,20 | 2,00 |
| 2 | 4 | 0,00 | 1 | 1,00 | 2 | 1 | 2 | 2 | 2 | 1 | 1,60 | 3,00 |
| 4 | 3 | 0,00 | 1 | 1,00 | 3 | 1 | 5 | 4 | 1 | 5 | 2,80 | 2,00 |
| 1 | 3 | 0,00 | 5 | 2,00 | 4 | 5 | 5 | 5 | 3 | 3 | 4,00 | 3,00 |
| 5 | 1 | 0,00 | 2 | 2,00 | 1 | 1 | 5 | 5 | 5 | 5 | 3,60 | 3,00 |
| 5 | 3 | 0,00 | 3 | 2,00 | 4 | 3 | 3 | 2 | 5 | 2 | 3,20 | 3,00 |

|   |   |      |   |      |   |   |   |   |   |   |      |      |
|---|---|------|---|------|---|---|---|---|---|---|------|------|
| 4 | 1 | 0,00 | 2 | 1,00 | 1 | 1 | 1 | 4 | 4 | 4 | 3,00 | 3,00 |
| 3 | 3 | 0,00 | 3 | 2,00 | 4 | 3 | 4 | 4 | 3 | 4 | 3,60 | 3,00 |
| 5 | 1 | 0,00 | 1 | 2,00 | 1 | 2 | 1 | 2 | 1 | 1 | 1,20 | 2,00 |
| 4 | 2 | 0,00 | 5 | 4,00 | 3 | 3 | 1 | 5 | 5 | 4 | 4,40 | 3,00 |
| 3 | 1 | 0,00 | 3 | 2,00 | 1 | 1 | 1 | 5 | 4 | 4 | 3,40 | 3,00 |
| 1 | 1 | 0,00 | 1 | 5,00 | 5 | 1 | 1 | 5 | 5 | 5 | 4,20 | 3,00 |
| 1 | 1 | 0,00 | 4 | 3,00 | 4 | 1 | 1 | 5 | 4 | 4 | 4,20 | 2,00 |
| 3 | 3 | 0,00 | 3 | 2,00 | 2 | 5 | 2 | 3 | 3 | 3 | 2,80 | 2,00 |
| 1 | 3 | 0,00 | 4 | 1,00 | 4 | 5 | 1 | 5 | 3 | 3 | 3,80 | 3,00 |
| 4 | 1 | 0,00 | 2 | 4,00 | 1 | 1 | 1 | 5 | 4 | 2 | 2,80 | 3,00 |
| 3 | 5 | 0,00 | 2 | 4,00 | 2 | 2 | 2 | 2 | 3 | 1 | 2,00 | 3,00 |
| 2 | 2 | 0,00 | 2 | 2,00 | 4 | 2 | 4 | 1 | 2 | 5 | 2,80 | 3,00 |
| 5 | 1 | 0,00 | 2 | 3,00 | 4 | 1 | 1 | 1 | 1 | 2 | 2,00 | 2,00 |
| 3 | 2 | 0,00 | 2 | 2,00 | 4 | 5 | 1 | 5 | 2 | 2 | 3,00 | 3,00 |
| 5 | 1 | 0,00 | 1 | 1,00 | 2 | 1 | 1 | 4 | 1 | 1 | 1,80 | 3,00 |
| 2 | 1 | 0,00 | 3 | 5,00 | 3 | 2 | 2 | 5 | 3 | 5 | 3,80 | 3,00 |
| 3 | 5 | 0,00 | 4 | 3,00 | 1 | 1 | 1 | 5 | 5 | 5 | 4,00 | 2,00 |
| 2 | 2 | 0,00 | 3 | 4,00 | 4 | 3 | 3 | 5 | 5 | 5 | 4,40 | 3,00 |
| 1 | 5 | 0,00 | 3 | 3,00 | 3 | 3 | 3 | 5 | 3 | 3 | 3,40 | 3,00 |
| 1 | 1 | 0,00 | 3 | 3,00 | 4 | 1 | 1 | 3 | 5 | 5 | 4,00 | 2,00 |
| 4 | 2 | 0,00 | 1 | 1,00 | 2 | 5 | 1 | 5 | 4 | 5 | 3,40 | 3,00 |
| 1 | 1 | 0,00 | 2 | 2,00 | 3 | 1 | 1 | 5 | 5 | 5 | 4,00 | 3,00 |
| 5 | 3 | 0,00 | 1 | 1,00 | 1 | 5 | 3 | 3 | 2 | 5 | 2,40 | 3,00 |
| 1 | 1 | 0,00 | 2 | 2,00 | 1 | 1 | 3 | 1 | 2 | 3 | 1,80 | 1,00 |
| 5 | 1 | 0,00 | 2 | 2,00 | 4 | 4 | 4 | 4 | 4 | 4 | 3,60 | 2,00 |
| 4 | 1 | 0,00 | 1 | 1,00 | 4 | 1 | 1 | 4 | 3 | 1 | 2,60 | 3,00 |
| 3 | 1 | 0,00 | 3 | 5,00 | 1 | 1 | 1 | 5 | 5 | 4 | 3,60 | 3,00 |
| 2 | 1 | 0,00 | 1 | 4,00 | 5 | 1 | 1 | 4 | 4 | 5 | 3,80 | 3,00 |
| 2 | 1 | 0,00 | 3 | 3,00 | 3 | 1 | 1 | 3 | 3 | 3 | 3,00 | 3,00 |
| 1 | 1 | 0,00 | 1 | 2,00 | 1 | 1 | 1 | 5 | 5 | 5 | 3,40 | 3,00 |
| 4 | 1 | 0,00 | 1 | 1,00 | 1 | 1 | 1 | 2 | 2 | 2 | 1,60 | 2,00 |
| 5 | 1 | 0,00 | 3 | 1,00 | 3 | 1 | 5 | 4 | 4 | 5 | 3,80 | 2,00 |
| 5 | 1 | 0,00 | 2 | 1,00 | 1 | 1 | 5 | 4 | 4 | 5 | 3,20 | 2,00 |

|   |   |      |   |      |   |   |   |   |   |   |      |      |
|---|---|------|---|------|---|---|---|---|---|---|------|------|
| 1 | 1 | 0,00 | 3 | 5,00 | 3 | 4 | 1 | 5 | 4 | 4 | 3,80 | 3,00 |
| 1 | 1 | 0,00 | 5 | 1,00 | 1 | 1 | 1 | 5 | 5 | 5 | 4,20 | 3,00 |
| 5 | 1 | 0,00 | 2 | 3,00 | 1 | 3 | 4 | 5 | 3 | 5 | 3,20 | 2,00 |
| 3 | 1 | 0,00 | 4 | 5,00 | 4 | 1 | 1 | 5 | 5 | 5 | 4,60 | 3,00 |
| 5 | 1 | 0,00 | 3 | 2,00 | 1 | 4 | 1 | 4 | 1 | 2 | 2,20 | 1,00 |
| 4 | 2 | 0,00 | 3 | 2,00 | 4 | 2 | 5 | 4 | 3 | 4 | 3,60 | 3,00 |
| 5 | 1 | 0,00 | 3 | 1,00 | 1 | 1 | 1 | 3 | 3 | 5 | 3,00 | 2,00 |
| 4 | 4 | 0,00 | 2 | 4,00 | 2 | 4 | 2 | 4 | 4 | 2 | 2,80 | 3,00 |
| 3 | 1 | 0,00 | 3 | 2,00 | 1 | 1 | 1 | 4 | 4 | 2 | 2,80 | 3,00 |
| 1 | 1 | 0,00 | 5 | 5,00 | 4 | 1 | 1 | 1 | 5 | 2 | 3,40 | 2,00 |
| 5 | 1 | 0,00 | 1 | 3,00 | 1 | 1 | 2 | 1 | 5 | 5 | 2,60 | 3,00 |
| 4 | 1 | 0,00 | 4 | 1,00 | 1 | 1 | 1 | 4 | 3 | 2 | 2,80 | 1,00 |
| 5 | 2 | 0,00 | 1 | 1,00 | 2 | 1 | 1 | 1 | 1 | 5 | 2,00 | 3,00 |
| 4 | 1 | 1,00 | 4 | 2,00 | 1 | 1 | 1 | 2 | 2 | 4 | 2,60 | 3,00 |
| 3 | 2 | 2,00 | 2 | 4,00 | 2 | 1 | 1 | 2 | 2 | 2 | 2,00 | 3,00 |
| 3 | 1 | 1,00 | 3 | 3,00 | 3 | 3 | 3 | 4 | 3 | 4 | 3,40 | 3,00 |
| 5 | 1 | 1,00 | 1 | 3,00 | 2 | 2 | 2 | 4 | 2 | 3 | 2,40 | 3,00 |
| 2 | 1 | 1,00 | 2 | 4,00 | 3 | 1 | 1 | 2 | 2 | 5 | 2,80 | 3,00 |
| 1 | 1 | 1,00 | 3 | 1,00 | 3 | 2 | 2 | 5 | 5 | 3 | 3,80 | 3,00 |
| 5 | 1 | 1,00 | 1 | 1,00 | 4 | 1 | 1 | 1 | 1 | 1 | 1,60 | 3,00 |
| 4 | 1 | 1,00 | 3 | 2,00 | 3 | 3 | 3 | 4 | 4 | 3 | 3,40 | 1,00 |
| 5 | 1 | 1,00 | 4 | 2,00 | 1 | 1 | 1 | 4 | 4 | 1 | 2,80 | 3,00 |
| 5 | 1 | 1,00 | 1 | 1,00 | 4 | 2 | 1 | 5 | 1 | 5 | 3,20 | 2,00 |
| 5 | 1 | 1,00 | 1 | 4,00 | 1 | 3 | 1 | 4 | 4 | 1 | 2,20 | 2,00 |
| 5 | 1 | 1,00 | 1 | 1,00 | 1 | 1 | 1 | 1 | 1 | 4 | 1,60 | 3,00 |
| 5 | 1 | 1,00 | 4 | 1,00 | 4 | 2 | 1 | 5 | 5 | 5 | 4,60 | 2,00 |
| 4 | 1 | 1,00 | 3 | 1,00 | 4 | 3 | 4 | 5 | 5 | 5 | 4,40 | 2,00 |
| 5 | 1 | 1,00 | 4 | 1,00 | 1 | 1 | 1 | 2 | 4 | 4 | 3,00 | 3,00 |
| 5 | 1 | 1,00 | 1 | 1,00 | 3 | 1 | 2 | 1 | 1 | 4 | 2,00 | 3,00 |
| 5 | 1 | 1,00 | 4 | 2,00 | 1 | 1 | 1 | 4 | 4 | 1 | 2,80 | 3,00 |
| 2 | 3 | 3,00 | 3 | 4,00 | 2 | 4 | 1 | 3 | 2 | 3 | 2,60 | 1,00 |
| 5 | 1 | 1,00 | 2 | 3,00 | 3 | 1 | 1 | 5 | 3 | 4 | 3,40 | 3,00 |
| 5 | 1 | 1,00 | 3 | 1,00 | 1 | 1 | 1 | 5 | 3 | 5 | 3,40 | 3,00 |

|   |   |      |   |      |   |   |   |   |   |   |      |      |
|---|---|------|---|------|---|---|---|---|---|---|------|------|
| 5 | 1 | 1,00 | 3 | 2,00 | 4 | 1 | 1 | 4 | 4 | 4 | 3,80 | 2,00 |
| 5 | 1 | 1,00 | 2 | 4,00 | 2 | 2 | 2 | 2 | 2 | 2 | 2,00 | 2,00 |
| 2 | 3 | 3,00 | 3 | 5,00 | 2 | 2 | 3 | 3 | 2 | 4 | 2,80 | 1,00 |
| 5 | 1 | 1,00 | 1 | 5,00 | 1 | 1 | 1 | 2 | 1 | 1 | 1,20 | 3,00 |
| 4 | 2 | 2,00 | 4 | 4,00 | 1 | 4 | 1 | 2 | 1 | 1 | 1,80 | 2,00 |
| 5 | 1 | 1,00 | 1 | 1,00 | 1 | 1 | 1 | 4 | 1 | 4 | 2,20 | 3,00 |
| 4 | 4 | 4,00 | 4 | 3,00 | 3 | 3 | 4 | 4 | 3 | 4 | 3,60 | 2,00 |
| 5 | 1 | 1,00 | 1 | 2,00 | 5 | 1 | 1 | 2 | 1 | 5 | 2,80 | 2,00 |
| 4 | 2 | 2,00 | 2 | 2,00 | 4 | 4 | 4 | 4 | 4 | 5 | 3,80 | 1,00 |
| 3 | 1 | 1,00 | 2 | 1,00 | 4 | 1 | 2 | 5 | 2 | 4 | 3,40 | 1,00 |
| 4 | 1 | 1,00 | 1 | 2,00 | 2 | 2 | 1 | 1 | 1 | 1 | 1,20 | 1,00 |
| 1 | 1 | 1,00 | 5 | 3,00 | 1 | 5 | 1 | 5 | 5 | 4 | 4,00 | 3,00 |
| 5 | 1 | 1,00 | 3 | 2,00 | 1 | 3 | 4 | 3 | 3 | 3 | 2,60 | 1,00 |
| 5 | 1 | 1,00 | 2 | 5,00 | 1 | 1 | 1 | 4 | 1 | 1 | 1,80 | 3,00 |
| 4 | 2 | 2,00 | 4 | 4,00 | 4 | 5 | 2 | 4 | 4 | 4 | 4,00 | 1,00 |
| 5 | 1 | 1,00 | 4 | 1,00 | 3 | 5 | 5 | 4 | 1 | 4 | 3,20 | 3,00 |
| 3 | 5 | 5,00 | 3 | 3,00 | 3 | 4 | 4 | 5 | 5 | 3 | 3,80 | 3,00 |
| 5 | 1 | 1,00 | 4 | 5,00 | 1 | 4 | 4 | 3 | 4 | 3 | 3,00 | 2,00 |
| 4 | 1 | 1,00 | 4 | 2,00 | 4 | 3 | 3 | 5 | 4 | 5 | 4,40 | 1,00 |
| 5 | 1 | 1,00 | 2 | 1,00 | 3 | 3 | 4 | 4 | 4 | 3 | 3,20 | 2,00 |
| 5 | 1 | 1,00 | 3 | 2,00 | 1 | 3 | 1 | 4 | 4 | 2 | 2,80 | 2,00 |
| 5 | 1 | 1,00 | 1 | 2,00 | 5 | 1 | 1 | 1 | 1 | 1 | 1,80 | 2,00 |
| 2 | 1 | 1,00 | 2 | 2,00 | 1 | 2 | 3 | 4 | 2 | 4 | 2,60 | 3,00 |
| 5 | 4 | 4,00 | 2 | 4,00 | 1 | 3 | 3 | 3 | 3 | 3 | 2,40 | 3,00 |
| 5 | 1 | 1,00 | 4 | 2,00 | 3 | 1 | 1 | 4 | 1 | 1 | 2,60 | 2,00 |
| 3 | 1 | 1,00 | 5 | 2,00 | 4 | 3 | 3 | 5 | 5 | 5 | 4,80 | 1,00 |
| 5 | 1 | 1,00 | 1 | 1,00 | 1 | 1 | 1 | 4 | 1 | 2 | 1,80 | 3,00 |
| 5 | 1 | 1,00 | 2 | 2,00 | 1 | 1 | 1 | 3 | 3 | 3 | 2,40 | 2,00 |
| 3 | 1 | 1,00 | 2 | 2,00 | 1 | 1 | 1 | 4 | 3 | 4 | 2,80 | 3,00 |
| 4 | 1 | 1,00 | 1 | 1,00 | 4 | 1 | 1 | 1 | 5 | 4 | 3,00 | 3,00 |
| 5 | 1 | 1,00 | 2 | 3,00 | 3 | 1 | 1 | 4 | 3 | 4 | 3,20 | 1,00 |
| 1 | 1 | 1,00 | 5 | 3,00 | 5 | 5 | 5 | 5 | 5 | 1 | 4,20 | 2,00 |
| 5 | 1 | 1,00 | 3 | 3,00 | 2 | 2 | 2 | 3 | 1 | 3 | 2,40 | 3,00 |

|   |   |      |   |      |   |   |   |   |   |   |      |      |
|---|---|------|---|------|---|---|---|---|---|---|------|------|
| 5 | 1 | 1,00 | 2 | 2,00 | 3 | 4 | 1 | 4 | 2 | 4 | 3,00 | 3,00 |
| 5 | 1 | 1,00 | 1 | 1,00 | 1 | 1 | 1 | 3 | 1 | 5 | 2,20 | 2,00 |
| 5 | 2 | 2,00 | 3 | 4,00 | 4 | 4 | 4 | 5 | 4 | 3 | 3,80 | 2,00 |
| 5 | 1 | 1,00 | 2 | 1,00 | 5 | 1 | 4 | 5 | 4 | 4 | 4,00 | 3,00 |
| 5 | 1 | 1,00 | 1 | 1,00 | 1 | 4 | 1 | 5 | 4 | 4 | 3,00 | 3,00 |
| 5 | 1 | 1,00 | 3 | 3,00 | 3 | 2 | 2 | 3 | 3 | 4 | 3,20 | 2,00 |
| 5 | 1 | 1,00 | 3 | 2,00 | 1 | 1 | 1 | 4 | 3 | 3 | 2,80 | 3,00 |
| 5 | 1 | 1,00 | 3 | 1,00 | 4 | 1 | 1 | 4 | 4 | 5 | 4,00 | 2,00 |
| 5 | 1 | 1,00 | 4 | 1,00 | 5 | 1 | 1 | 4 | 1 | 2 | 3,20 | 3,00 |
